# Supplementary material for: CD103 and CD39 coexpression identifies neoantigen-specific cytotoxic T cells in colorectal cancers with low mutation burden
Source: PubMed Central journal article supplement — J Immunother Cancer. 2023 Feb 15;11(2):e005887. doi: 10.1136/jitc-2022-005887 (PMC9933759; doi:10.1136/jitc-2022-005887), 2023-02-15
Supplement: jitc-2022-005887supp001.pdf [file jitc-2022-005887supp001.pdf]

### Supporting documents

**Figure S1** | Phenotypic analysis of the flow sorted CD8<sup>+</sup> T cell subsets. A,B) Summary of T cell subset relative frequencies at flow sorting. The error bars represent the median with interquartile range. C-D) Frequency of CD8<sup>+</sup> T cells that express CD69 (C), CD127 (D) or PD-1 (E) in each subset. The error bars represent the median with interquartile range. F) Mean fluorescence intensity of PD-1 expression on CD8 T cells. A-F) Each graph includes the result of an one-way ANOVA test.

**Figure S2** | T cell reactivity screening. IFN- $\gamma$  and granzyme B release was measured by ELISA in the supernatant of the co-culture assay for each patient, performed in two independent assays. Each T cell product is visualized by a distinct color: DP in yellow, SP39 red, SP(103) in blue, DN in black and bulk TIL in green. Potential epitopes are marked by an asterisk \*. Positive (SEB) and negative (EBV-LCL with DMSO) controls are included at the far right of the graphs.

**Figure S3** | Validation of potential neoantigen-specific T cell responses. The validation measurements are visualized for each patient, including IFN- $\gamma$ , granzyme B and flow cytometric measures CD137 and OX40. T cell responses derived from the bulk TIL (green) or DP (yellow) are depicted against the corresponding wild-type peptide (grey) or a DMSO control (grey). The respective neo-epitope is listed within each graph.

**Figure S4** | Intracellular IFN- $\gamma$  expression in TIL after stimulation with neoepitopes. A) Representative sample with increased IFN- $\gamma$  expression specifically in the CD4<sup>+</sup> T cells. B) Each graph depicts the percentage of IFN- $\gamma$ <sup>+</sup> cells that were determined to be either CD4<sup>+</sup> or CD8<sup>+</sup> T cells per sample. NIC4 L29 was validated as a true CD8-mediated response, as it was also detected in the DP CD8<sup>+</sup> T cell subset.

Figure S1

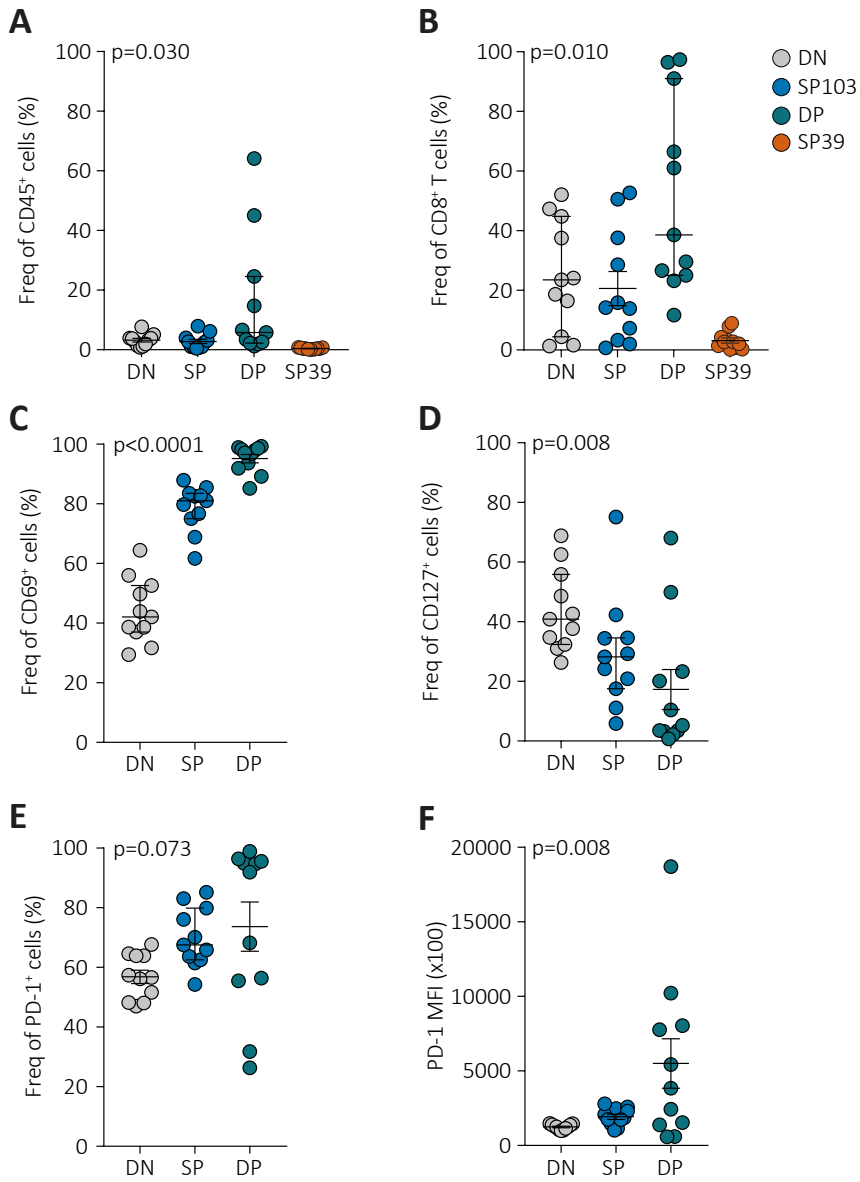

Figure S2

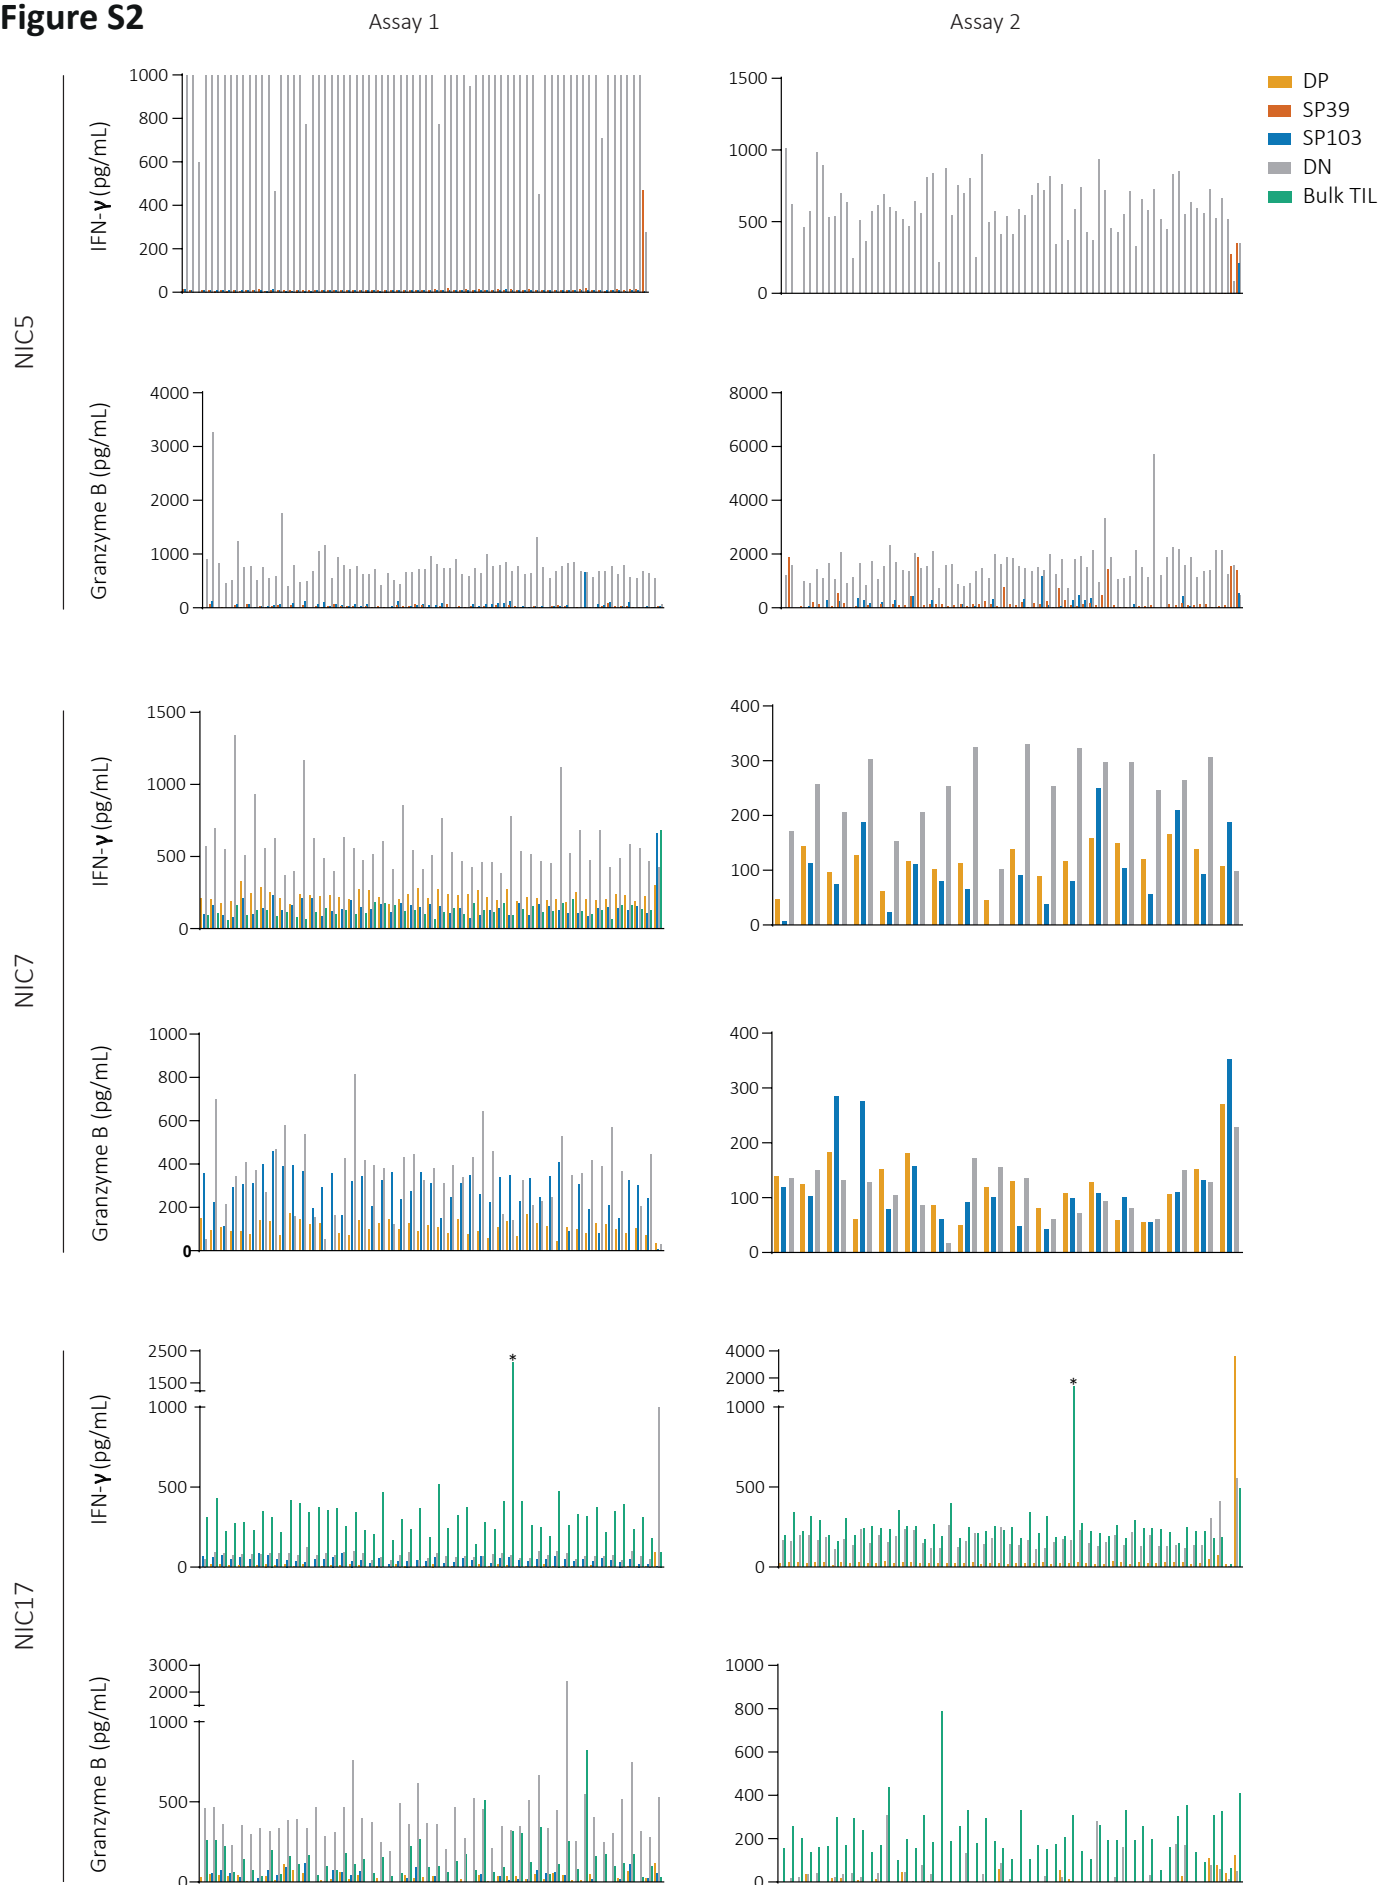

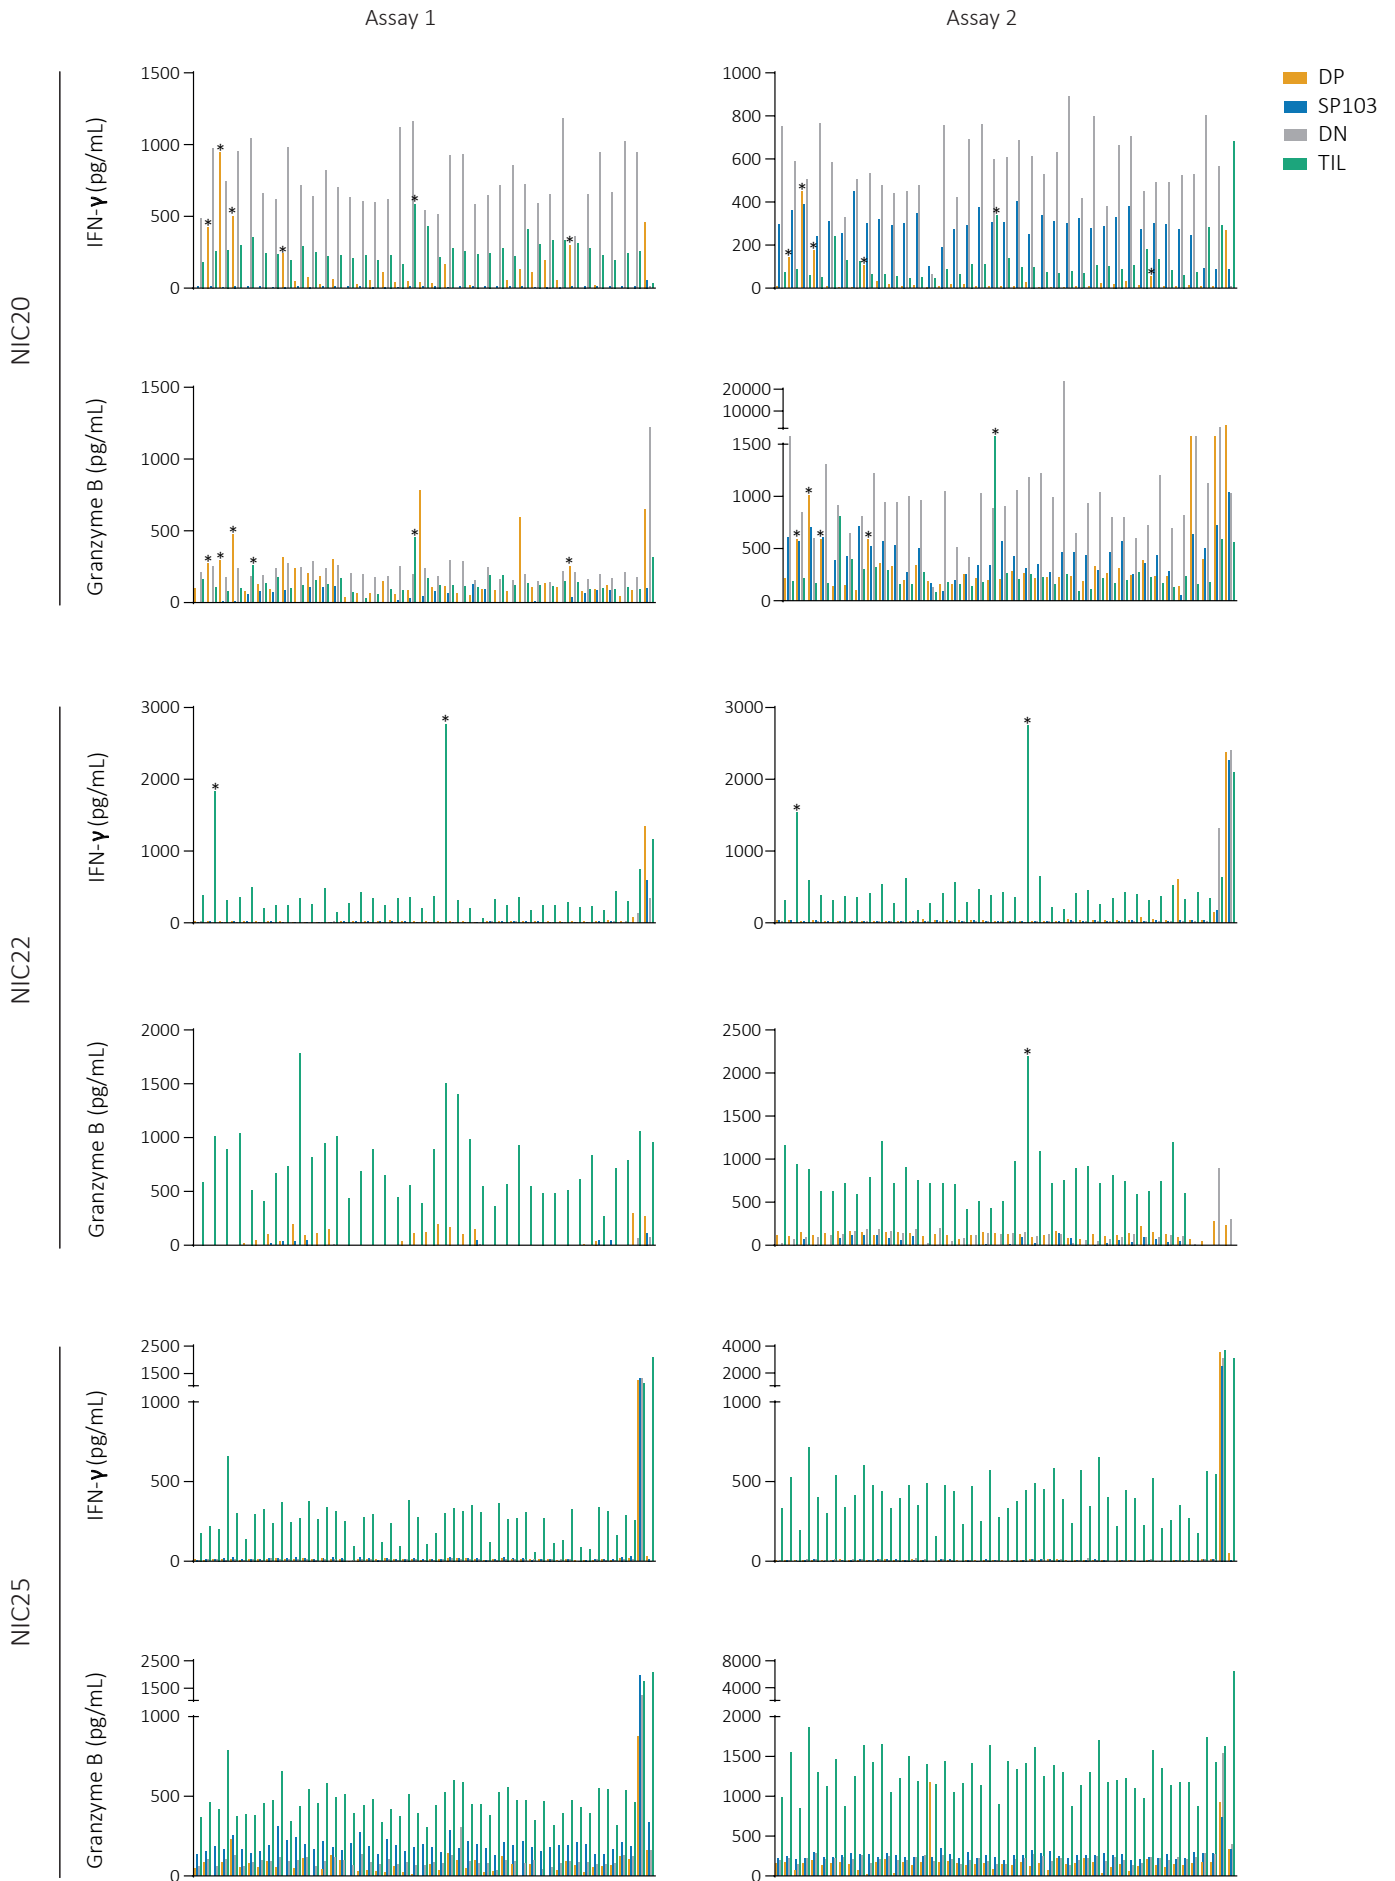

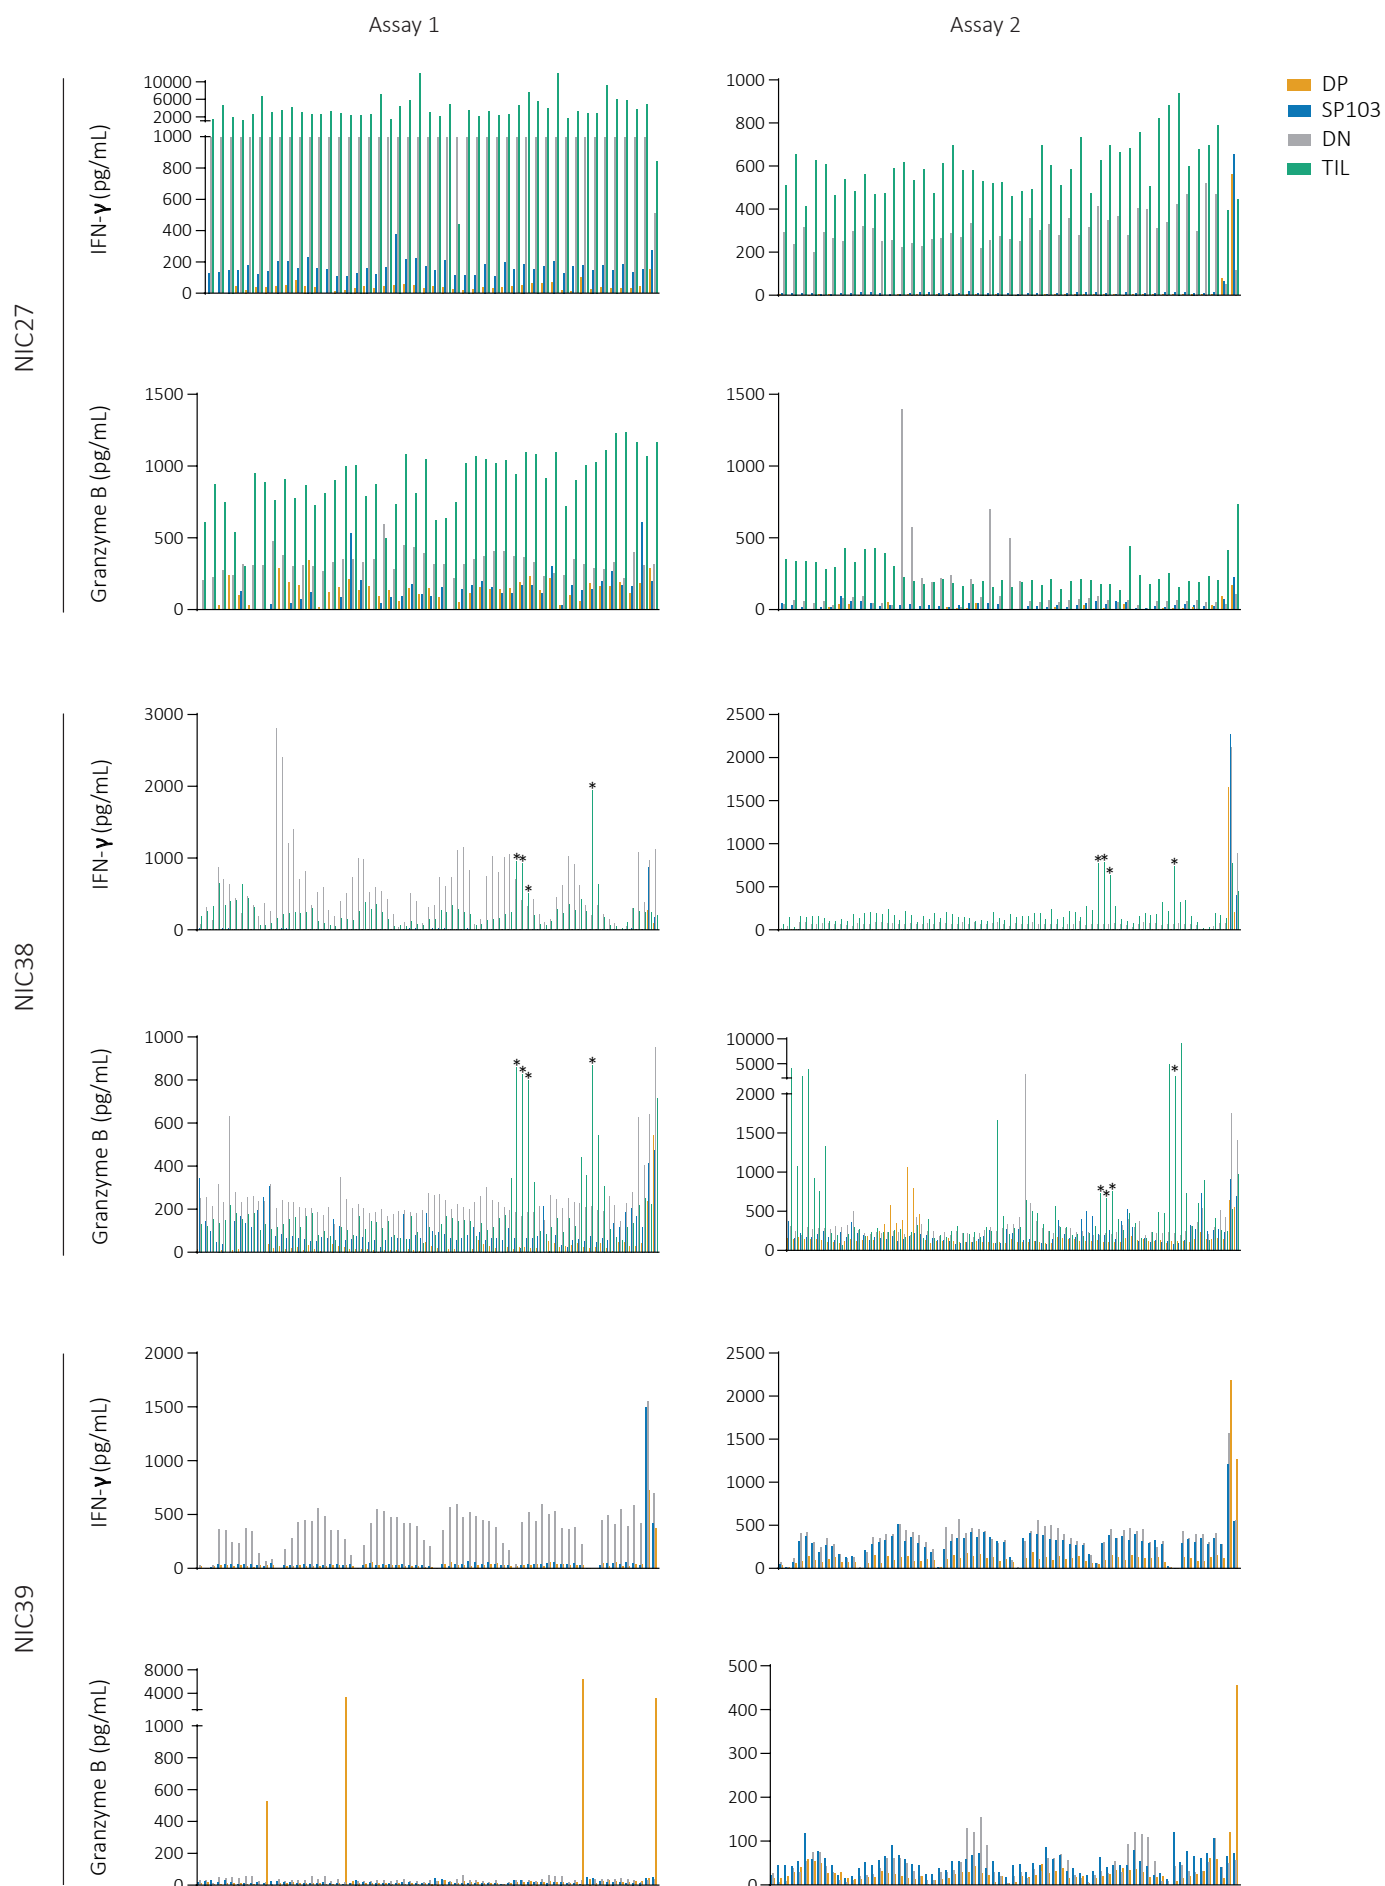

Figure S3

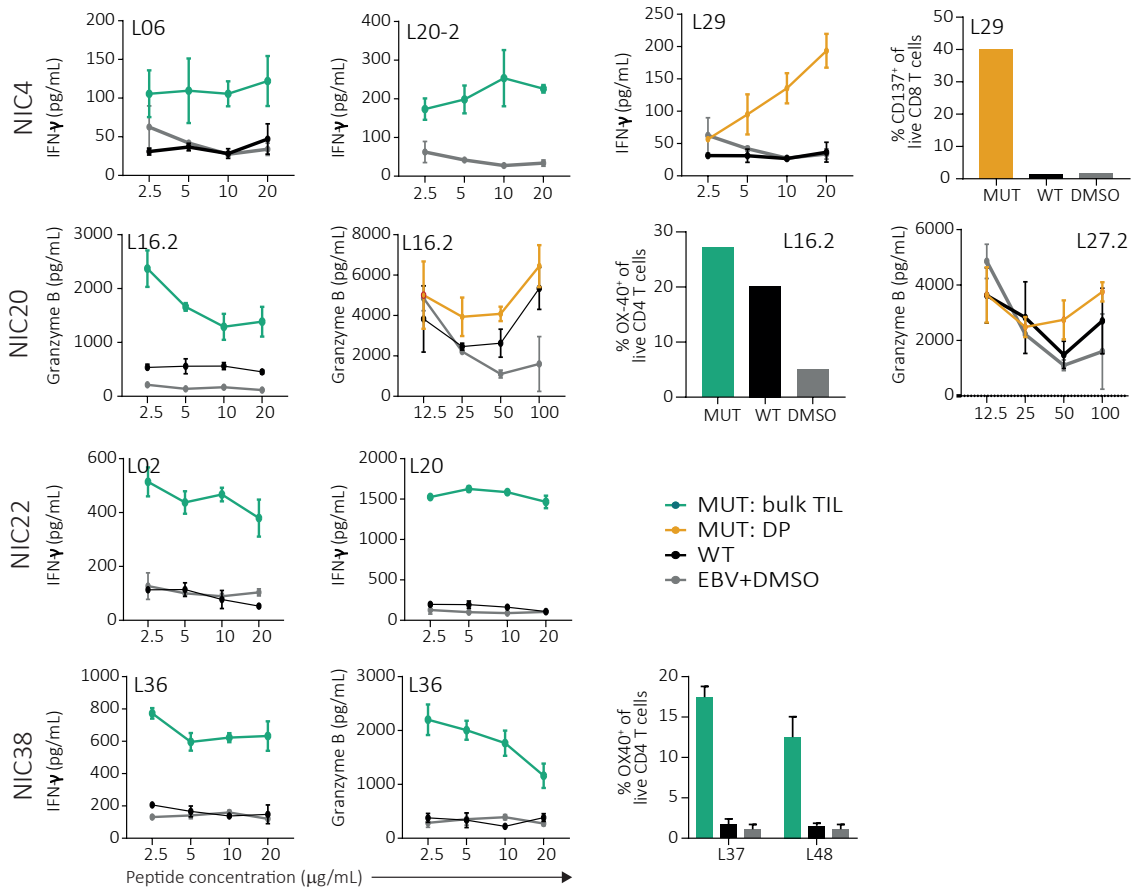

**Figure S4**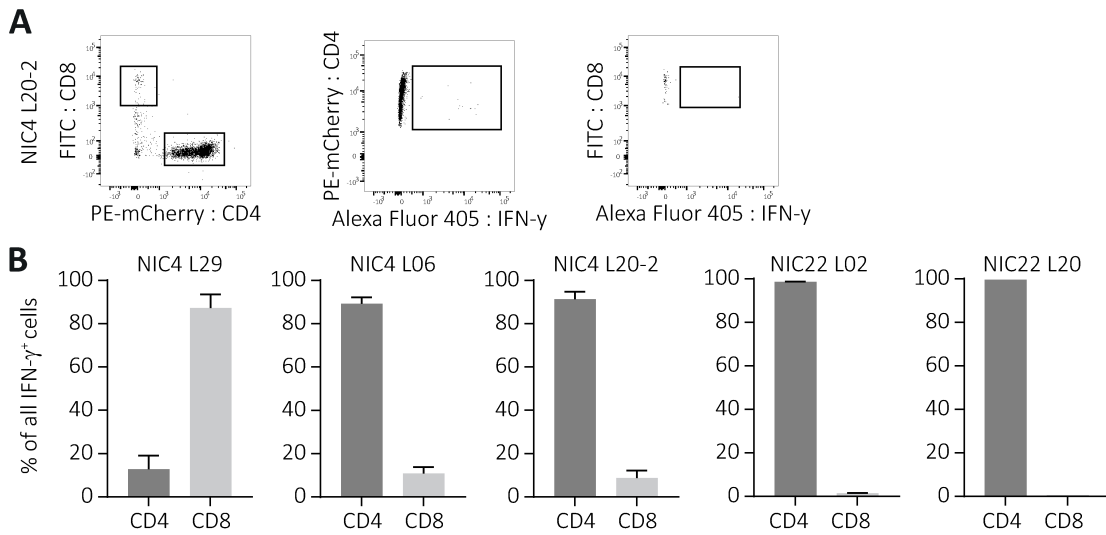

**Table S1** | Percentage of CD4+ and CD8+ T cells in expanded bulk TIL cultures.

| Patient ID | CD4 (%) | CD8 (%) |
|------------|---------|---------|
| NIC4       | 81      | 19      |
| NIC5       | 93      | 7       |
| NIC7       | 92      | 8       |
| NIC16      | 61      | 39      |
| NIC17      | 34      | 66      |
| NIC20      | 96      | 4       |
| NIC22      | 50      | 50      |
| NIC25      | 95      | 5       |
| NIC27      | 60      | 40      |
| NIC38      | 28      | 72      |
| NIC39      | 99      | 1       |



**Table S2** | All mutant peptide sequences that were investigated for T cell reactivity.

| Patient ID | Mutational position   | Mutation type    | Gene            | SLP ID | Peptide sequence            |
|------------|-----------------------|------------------|-----------------|--------|-----------------------------|
| NIC4       | chr1_11950386_G/A     | Missense         | <i>PLOD1</i>    | L01    | ADSYDVLVFAFGPQELLLKFRQARSQ  |
| NIC4       | chr11_14818305_G/A    | Missense         | <i>PDE3B</i>    | L02    | FPDTADFLNKPSIILQRSLGNAPNT   |
| NIC4       | chr11_74374521_C/T    | Missense         | <i>PGM2L1</i>   | L03    | ENLLRNGMKNLEQLDRCCRMFTGTA   |
| NIC4       | chr11_86446352_G/A    | Missense         | <i>ME3</i>      | L04    | PGVALGVIAGGIWHPIDEFLLTAE    |
| NIC4       | chr12_25245347_C/T    | Missense         | <i>KRAS</i>     | L05    | YKLVVVGAGDVGKSAITLIQIQ      |
| NIC4       | chr14_58223625_G/A    | Missense         | <i>ACTR10</i>   | L06    | SVPEGVLEDIKAHTCFVSDLKRGLK   |
| NIC4       | chr14_73276592_C/T    | Missense         | <i>NUMB</i>     | L07    | PSPTNPFSSDLQKTFKIEL         |
| NIC4       | chr14_73276674_C/G    | Missense         | <i>NUMB</i>     | L08    | TGTCVPDPFEAQCAALENKSKQRTN   |
| NIC4       | chr14_80792789_C/A    | Missense         | <i>CEP128</i>   | L09    | KLERALEKQSETFDELTKNNQILK    |
| NIC4       | chr16_28830704_G/C    | Missense         | <i>ATXN2L</i>   | L10    | GVRCSRRGGRRPALSLPPRGPVHHL   |
| NIC4       | chr17_42787309_A/G    | Missense         | <i>WNK4</i>     | L11    | EMVALGLVCEADCQVAVRERVA      |
| NIC4       | chr17_44190551_G/A    | Missense         | <i>TMUB2</i>    | L12    | GQESQMKLIYQGHLLQDPARTLRSL   |
| NIC4       | chr17_63420571_G/A    | Missense         | <i>TANC2</i>    | L13    | PPPVGQGGKEYPNPPSPLRGPPQY    |
| NIC4       | chr17_7674221_G/A     | Missense         | <i>TP53</i>     | L14    | YMCNSSCMGGMNWRPILITITLEDSSG |
| NIC4       | chr19_10555328_CCTT/C | Inframe deletion | <i>KRI1</i>     | L15    | FGLSTEEILAADELNRWCSLKKTCM   |
| NIC4       | chr19_1093973_G/A     | Missense         | <i>POLR2E</i>   | L16    | QFGDKPSEGRPRCTDLTVLVAHND    |
| NIC4       | chr19_13074002_C/A    | Missense         | <i>NFIX</i>     | L17    | YYNINQVTLGRRYITSPSTTTKR     |
| NIC4       | chr2_219615172_C/T    | Missense         | <i>STK11IP</i>  | L18    | TLFLLEDAAGSLAEFSPPAASGEA    |
| NIC4       | chr2_74889415_G/A     | Missense         | <i>HK2</i>      | L19    | AGMAAVVDRIENHGLDALKVTVGV    |
| NIC4       | chr20_57378098_A/G    | Stop loss        | <i>RAE1</i>     | L20-1  | NAAEELKPRNKVWLETLAQPELFL    |
|            |                       |                  |                 | L20-2  | WWLETLAQPELFLSTLPHLCTNLGP   |
|            |                       |                  |                 | L20-3  | LSTLPHLCTNLGSLVGLSAMDMDF    |
|            |                       |                  |                 | L20-4  | PSLVGLSAMDMDFNWRKRCHCSAA    |
|            |                       |                  |                 | L20-5  | FNPWRKRCHCSAAESPVVGRDPLSL   |
|            |                       |                  |                 | L20-6  | SAAESPVVGRDPLSLHSTACCRVFL   |
| NIC4       | chr3_11259275_G/A     | Missense         | <i>HRH1</i>     | L21    | SLSVADLIVGAVIMPNNILYLMMSK   |
| NIC4       | chr3_192144025_T/G    | Missense         | <i>FGF12</i>    | L22    | SGTPTMNGGKVVTDQST           |
| NIC4       | chr3_37298887_G/A     | Missense         | <i>GOLGA4</i>   | L23    | VKTLETLQQRVKHQNELLKRCKETI   |
| NIC4       | chr4_143185536_C/T    | Missense         | <i>USP38</i>    | L24    | LKRIVVRKVVESVHWLDEAQCEAM    |
| NIC4       | chr5_103028911_T/A    | Missense         | <i>PAM</i>      | L25    | GRFRGKGSGLNHGNFFASRKGYSR    |
| NIC4       | chr5_112838150_GGA/G  | Frameshift       | <i>APC</i>      | L26-1  | SSRSEKDRSLERTRNWSRQLPSSNR   |
|            |                       |                  |                 | L26-2  | TRNWSRQLPSSNRKSRNFFKARFAD   |
|            |                       |                  |                 | L26-3  | RKSRNFFKARFADLHHCSPDCQSHG   |
|            |                       |                  |                 | L26-4  | DLHHCSPDCQSHGRSVSHYLSGRQ    |
|            |                       |                  |                 | L26-5  | PDCQSHGRSVSHYLSGRQKFWVYH    |
| NIC4       | chr7_94400200_C/T     | Missense         | <i>COL1A2</i>   | L27    | PAGDRGPRGERGLPGPPGRDGEDGP   |
| NIC4       | chr8_142613268_C/T    | Missense         | <i>ARC</i>      | L28    | QYVVGTLQPKLKHFLRHLPLKTLQ    |
| NIC4       | chr8_93923083_C/T     | Missense         | <i>PDP1</i>     | L29    | PKSEAKSVVQDWLLGLLMPFRAFQ    |
| NIC4       | chrX_1593799_C/T      | Missense         | <i>AKAP17A</i>  | L30    | IKLSGFSDLKCAAEFKIDFPTRH     |
| NIC5       | chr1_171584051_A/C    | Missense         | <i>PRRC2C</i>   | L01    | TAIHNFTVHQALAKAQSGLAFQ      |
| NIC5       | chr1_207767803_C/T    | Missense         | <i>CD46</i>     | L02-1  | LSHSVSTSTTKFPASSASGPRPTY    |
|            |                       |                  |                 | L02-2  | KCLKVSTSTTKFPASSASGPRPTY    |
|            |                       |                  |                 | L02-3  | KCLKVSTSTTKFPASSASGYPKPE    |
| NIC5       | chr1_209783196_G/C    | Missense         | <i>C1orf74</i>  | L03    | LKALVAEIIITHLEGLQDLSLAVSY   |
| NIC5       | chr1_46270754_C/T     | Missense         | <i>RAD54L</i>   | L04    | AASEADRQLGEEWLRRELSIVNRCL   |
| NIC5       | chr1_90027699_T/G     | Stop lost        | <i>ZNF326</i>   | L05-1  | EELEETEAKEEPADFPVEQPEENEI   |
|            |                       |                  |                 | L05-2  | PADFPVEQPEENEI              |
| NIC5       | chr10_114575476_T/A   | Missense         | <i>ABLIM1</i>   | L06    | TRCHGCGEFVEGVVVTALGKTYHPN   |
| NIC5       | chr10_73915266_C/T    | Missense         | <i>PLAU</i>     | L07    | GFGKENSTDYLYLEQLKMTVVKLIS   |
| NIC5       | chr11_66020856_T/A    | Missense         | <i>CATSPER1</i> | L08    | IFTTIFTLFTLLSLDDWSLIVYMSDR  |
| NIC5       | chr11_67999580_C/T    | Missense         | <i>UNC93B1</i>  | L09    | NYWERYTLPSTVALGMAIVPLWA     |
| NIC5       | chr11_95783089_T/A    | Missense         | <i>FAM76B</i>   | L10-1  | HPKHHHHHHHHHLRSHSSHKISNL    |
|            |                       |                  |                 | L10-2  | RKTSIIQNIITITITFTVAIT       |
| NIC5       | chr13_45525021_A/G    | Missense         | <i>COG3</i>     | L11-1  | LKTMASQGGPKYALSQQPWAQPAKV   |
|            |                       |                  |                 | L11-2  | VKNNGQSGRPQVCSLTAALGTTSKG   |
| NIC5       | chr13_98809435_G/A    | Missense         | <i>DOCK9</i>    | L12    | FERLAHYDLTHWYASKVTEVMHSG    |
| NIC5       | chr14_103135969_G/A   | Missense         | <i>TNFAIP2</i>  | L13    | VSTASIRRHQVAPQLQAGPAMGP     |
| NIC5       | chr14_64065516_G/A    | Missense         | <i>SYNE2</i>    | L14    | RQILRLRLRCKTNDGICLLKIVSA    |
| NIC5       | chr15_41669457_A/T    | Missense         | <i>MGA</i>      | L15    | FYKLLKTNNTLDLEGHILHSMHRY    |
| NIC5       | chr16_346835_G/A      | Missense         | <i>AXIN1</i>    | L16    | IKGETSTATPRRLDLDLGYEPGESA   |
| NIC5       | chr16_88631239_G/T    | Missense         | <i>ZC3H18</i>   | L17    | ASTLSRREELKHLKAVEDAIARRK    |
| NIC5       | chr17_31233211_TG/T   | Frameshift       | <i>NF1</i>      | L18    | MMGDQGLPIAMALANVVPSCQWMN    |
| NIC5       | chr17_39725079_G/A    | Missense         | <i>ERBB2</i>    | L19    | AKGMSYLEDRVLIHRDLAARNVLIK   |
| NIC5       | chr17_48860426_T/C    | Missense         | <i>CALCOCO2</i> | L20    | TSDEGGARQNPGPAYGNPYSGIQES   |
| NIC5       | chr17_58357951_G/A    | Missense         | <i>RNF43</i>    | L21    | QVTRNSAAPSGLWSNPQCPRALPE    |
| NIC5       | chr17_7673776_G/A     | Missense         | <i>TP53</i>     | L22    | FEVRVCACPRDWRTEENLRKKGE     |
| NIC5       | chr19_48441818_C/T    | Missense         | <i>GRIN2D</i>   | L23    | FIYDAAVLNYMACKDEGCKLVITIGS  |
| NIC5       | chr19_49447035_G/C    | Missense         | <i>PIH1D1</i>   | L24-1  | LEAPDLLAEVDVPKLDGALGLSLE    |
|            |                       |                  |                 | L24-2  | LEAPDLLAEVDVPKLDGALGLSLE    |

|      |                        |                   |                     |       |                            |
|------|------------------------|-------------------|---------------------|-------|----------------------------|
|      |                        |                   |                     | L24-3 | HLNLWLEAPDLLLAEIDVPKLTLOI  |
|      |                        |                   |                     | L24-4 | LEAPDLLLAEIDVPKLNLSHESKAA  |
| NIC5 | chr19_55401666_G/A     | Missense          | <i>UBE2S</i>        | L25   | RLLLENYEEYAAWARLLTEIHGGAG  |
| NIC5 | chr2_110144543_C/G     | Missense          | <i>NPHP1</i>        | L26   | IPAKTYELFLNGATPYEKIEVDPS   |
| NIC5 | chr2_127050828_C/A     | Missense          | <i>BIN1</i>         | L27   | GTVEGSGAGRLYLPPGFMFVKVQAQ  |
| NIC5 | chr2_127426153_G/A     | Missense          | <i>PROC</i>         | L28   | MEKKRSHLKRDTKDQEDQVDPRLID  |
| NIC5 | chr2_240462422_A/T     | Missense          | <i>GPC1</i>         | L29   | LFKQLHPQLLPVDYLDCLGKQAEA   |
| NIC5 | chr2_96298337_G/C      | Missense          | <i>SNRNP200</i>     | L30   | ERIMGKMEADPEVSKFLYQLHETEK  |
| NIC5 | chr20_18183172_C/T     | Missense          | <i>KAT14</i>        | L31   | TKPPKQLLSQICSHLHRSDPHWTP   |
| NIC5 | chr20_46374418_C/T     | Missense          | <i>ELMO2</i>        | L32   | DTYIRIVLENSSQEDKHECPFRSA   |
| NIC5 | chr3_197065340_G/A     | Missense          | <i>DLG1</i>         | L33   | MEKDIQEHKFIEVGQYNNHLYGTSV  |
| NIC5 | chr4_139370290_G/C     | Missense          | <i>NAA15</i>        | L34   | QRRAQKKAQIEEDKNAEKEKQQRN   |
| NIC5 | chr4_148120260_C/T     | Missense          | <i>NR3C2</i>        | L35-1 | NLGERRCISLPCINYARGCTKSAFS  |
|      |                        |                   |                     | L35-2 | FNEEKMHQSAMYKLCQGMHQISLQF  |
| NIC5 | chr5_112839398_AAT/A   | Frameshift        | <i>APC</i>          | L36   | CKVSSINQETIQTYCEDTPMFFKM   |
| NIC5 | chr5_112839906_AC/A    | Frameshift        | <i>APC</i>          | L37-1 | SPGQTMPPSRSKNLHLHLKQKPE    |
|      |                        |                   |                     | L37-2 | KNLHLLKQLKPESEYKIKHLLK     |
|      |                        |                   |                     | L37-3 | KPSEKYLKIKHLLKREVRDLKSLQ   |
| NIC5 | chr5_138924582_G/A     | Missense          | <i>CTNNA1</i>       | L38   | IALQEKDVDGLDHTAGAIRGAARV   |
| NIC5 | chr5_157809736_G/A     | Missense          | <i>CLINT1</i>       | L39   | WDEEWDKNKSALFSDKLGELSDKI   |
| NIC5 | chr6_105282511_C/G     | Missense          | <i>PREP</i>         | L40   | DFQCAAELYKERYTSPKRLTINGG   |
| NIC5 | chr6_135463154_G/T     | Missense          | <i>AH1</i>          | L41   | TEDSMQDDTKPKQKTKKTKAVAD    |
| NIC5 | chr6_136356706_T/A     | Missense          | <i>MAP7</i>         | L42   | VGSPHVVTSHQSNVTVSTPDLEKQ   |
| NIC5 | chr6_168078950_T/A     | Missense          | <i>FRMD1</i>        | L43   | CSQEQPTLGMALASEHRDVLVLLP   |
| NIC5 | chr6_26413488_G/T      | Missense          | <i>BTN3A1</i>       | L44   | GLTDGNKYRTLDPRTNLKPKPPK    |
| NIC5 | chr7_76625578_T/TTCTCC | Inframe insertion | <i>POMZP3</i>       | L45   | TVLSALKEKKKKEKRTVEEDQIFL   |
| NIC5 | chr7_99454126_C/G      | Missense          | <i>CPSF4</i>        | L46-1 | AGNRGPRPLEQVSCYCKGEGHYAN   |
|      |                        |                   |                     | L46-2 | AGNRGPRPLEQVSCYCKCCCLSLFF  |
|      |                        |                   |                     | L46-3 | RATGDPGHWSRSRAVTSVARKDTPPT |
| NIC5 | chr8_100153299_G/A     | Missense          | <i>POLR2K</i>       | L47   | IRCREGCRIMYKRTKRLVIFDAR    |
| NIC5 | chr8_37899408_C/A      | Missense          | <i>RAB11FIP1</i>    | L48   | MMLMVSAGRWLVAVWSPHVVQVTVL  |
| NIC5 | chr8_73673126_G/C      | Missense          | <i>STAU2</i>        | L49-1 | KPFPNYRANYNFGGMYNQRYHCPVP  |
|      |                        |                   |                     | L49-2 | KPFPNYRANYNFGGMYNQRWQLNG   |
|      |                        |                   |                     | L49-3 | YRPLDPKPFPNYRANYNFGGMYNQR  |
| NIC5 | chr9_114169425_A/G     | Missense          | <i>COL27A1</i>      | L50   | FHLAGSTPFLLVGGPPGPKDGLP    |
| NIC5 | chr9_134050430_G/T     | Missense          | <i>BRD3</i>         | L51   | VTSVPVPPAAATPPATPIVVPVPP   |
| NIC5 | chr9_134690995_C/T     | Missense          | <i>COL5A1</i>       | L52   | DGITKTTGFCATWRSSKGPDVAYRV  |
| NIC5 | chr9_136946680_G/A     | Missense          | <i>C8G</i>          | L53   | QIFYFPKYGFCEAADQFHILDEVRR  |
| NIC5 | chr9_19378868_C/T      | Missense          | <i>RPS6</i>         | L54   | RISGGNDKQGFPIKQVGLTHGRVRL  |
| NIC5 | chrX_49065811_G/A      | Missense          | <i>CCDC120</i>      | L55   | SSFEGRSVPATILTRGAGPQLCKP   |
| NIC5 | chr4_141222377_TA/T    | Frameshift        | <i>ZNF330</i>       | L56   | MPKKRLVRGRRRLTAENVKNN      |
| NIC7 | chr1_166858202_C/A     | Missense          | <i>TADA1</i>        | L01   | SHPPPDDAEQQASLLLACSGDTPA   |
| NIC7 | chr1_173984497_A/T     | Splice            | <i>RC3H1</i>        | L02-1 | LALYKPLSSARGKFVFSYLKSKT    |
|      |                        |                   |                     | L02-2 | RGKFVFSYLKSKTAFKYSVHNPI    |
| NIC7 | chr1_206195806_A/C     | Missense          | <i>FAM72A</i>       | L03   | CSSCLLSCNNGHVWMFHSQAVYDIN  |
| NIC7 | chr1_224294313_C/T     | Missense          | <i>NVL</i>          | L04   | SLDPALRRAGRFNREICLGPDEAS   |
| NIC7 | chr1_32091892_C/T      | Missense          | <i>TMEM39B</i>      | L05-1 | AMPTHACCLSPSFIRSEVFLKMDF   |
|      |                        |                   |                     | L05-2 | AHKTAVWPGRHAHPCLLPVTLHPQ   |
| NIC7 | chr1_51302546_G/A      | Missense          | <i>TTC39A</i>       | L06   | FVLGTGNVNIEVEKLLKPYLNRYP   |
| NIC7 | chr1_7778152_T/TCAG    | Inframe insertion | <i>VAMP3</i>        | L07   | KMWAIGITVLVIFSIHIIIIVWVSS  |
| NIC7 | chr10_112425377_T/G    | Missense          | <i>ACSL5</i>        | L08   | GTLKIIRKKNIVKLAQGEYIAPEK   |
| NIC7 | chr10_472477_C/A       | Missense          | <i>DIP2C</i>        | L09   | PVTPSSASRYHRLRSRSGRDERYRS  |
| NIC7 | chr10_47922844_G/T     | Missense          | <i>CH17-360D5.1</i> | L10   | FAVLVLPVLFVNFLEDDWHHEAIPC  |
| NIC7 | chr10_50814032_G/A     | Missense          | <i>A1CF</i>         | L11-1 | RAIIRAPSVRGAVGVRGLGGGRGYLA |
|      |                        |                   |                     | L11-2 | VREIYMNVVPGAVGVRGLGGGRGYLA |
| NIC7 | chr11_59152054_G/A     | Missense          | <i>FAM111A</i>      | L12   | EIETHQQQEMLVHGTEGIEKYNLNG  |
| NIC7 | chr12_16363960_T/G     | Missense          | <i>MGST1</i>        | L13   | HTIAYLTPLPQPKRALSFVGVYGT   |
| NIC7 | chr12_1754359_GAA/G    | Frameshift        | <i>ADIPOR2</i>      | L14-1 | MNEPTAPIGVQQDSRARYKAQKRAP  |
|      |                        |                   |                     | L14-2 | IGVQQDSRARYKAQKRAPTGWYTKR  |
| NIC7 | chr12_56257327_G/A     | Missense          | <i>ANKRD52</i>      | L15   | LDQERRTPLHAAYVVDVPIQLLLL   |
| NIC7 | chr13_109783442_C/T    | Missense          | <i>IRS2</i>         | L16   | TQPPHPVVPSPVQPSGGRPEFLGQ   |
| NIC7 | chr13_113766192_G/A    | Missense          | <i>TMEM255B</i>     | L17   | GSLLLVSLIVTIGLAATTRTENVT   |
| NIC7 | chr16_72950933_C/T     | Missense          | <i>ZFHX3</i>        | L18-1 | LVGGEIPLDMRLRGGQLVSEELMNL  |
|      |                        |                   |                     | L18-2 | MRLRGGQLVSEELMNLGESFIQTND  |
| NIC7 | chr17_7676002_TCA/T    | Frameshift        | <i>TP53</i>         | L19-1 | RLGFLHSGTAKSDLHVLPCPQQDVL  |
|      |                        |                   |                     | L19-2 | SDLHVLPCPQQDVLPTGQDLPCAAY  |
|      |                        |                   |                     | L19-3 | DLHVLPCPQQDVLPTGQDLPCAAYG  |
|      |                        |                   |                     | L19-4 | YQGSYGFRLGFLHSGTAKSDLHVL   |
|      |                        |                   |                     | L19-5 | RLGFLHSGTAKSDLHVLPTGQDL    |
|      |                        |                   |                     | L19-6 | HSGTAKSDLHVLPTGQDLPCAAYG   |
| NIC7 | chr19_39879805_G/A     | Missense          | <i>FCGBP</i>        | L20   | GGQGVCLPNYAMCWLWDGPHYHSF   |

|       |                                     |            |                 |       |                             |
|-------|-------------------------------------|------------|-----------------|-------|-----------------------------|
| NIC7  | chr19_55093057_C/T                  | Missense   | <i>PPP1R12C</i> | L21   | KPAQSLDPSRRPHVPGVENS DSPAQ  |
| NIC7  | chr2_240464953_C/A                  | Missense   | <i>GPC1</i>     | L22   | RRRGKLAPRRPHSGTLEKLVSEAK    |
| NIC7  | chr20_34776325_C/T                  | Missense   | <i>NCOA6</i>    | L23   | LRILAQSNQQLQDLGILSVQIEGE    |
| NIC7  | chr20_35044541_A/C                  | Missense   | <i>TRPC4AP</i>  | L24   | TLLAKNAQKKKSVSLGSPAAEINQA   |
| NIC7  | chr22_17108607_C/T                  | Missense   | <i>IL17RA</i>   | L25   | TRAKWQALLGRGVPVRLRCDH GKPV  |
| NIC7  | chr3_101857345_G/T                  | Missense   | <i>NFKB1Z</i>   | L26   | TALHVAASLQYRFQTLDVAVLLMRK   |
| NIC7  | chr4_13602515_C/T                   | Missense   | <i>BOD1L1</i>   | L27   | KYAETVKLKHKRNPGKVKDISIDVE   |
| NIC7  | chr7_129413686_G/A                  | Missense   | <i>AHCYL2</i>   | L28   | VCNMGHSNTEIDMASLRTPELTWER   |
| NIC7  | chr8_66429486_C/A                   | Missense   | <i>RRS1</i>     | L29   | RPRPLTRWQQFAILKGRIPKKTNL    |
| NIC7  | chrM_15617_G/A                      | Missense   | <i>MT-CYB</i>   | L30   | TILRSVPNKLGGILALLLSLILAM    |
| NIC7  | chrX_54541327_C/T                   | Missense   | <i>GNL3L</i>    | L31   | KQQAAREQERQKCRITIESYCDVLR   |
| NIC7  | chr19_48195980_G/A                  | Missense   | <i>C19orf68</i> | L32   | WRGAQLHDERAGELRTAEWKGPQSE   |
| NIC7  | chr1_18910469_C/T                   | Missense   | <i>IFFO2</i>    | L33-1 | CNPTIDLQGELKLATAKSDMNRHLH   |
|       |                                     |            |                 | L33-2 | KEYQETIGQIELKLATAKSDMNRHL   |
| NIC16 | chr10_102366504_A/T                 | Missense   | <i>GBF1</i>     | L01   | IQRLLAEFTERWLNLCNGSPFANSDA  |
| NIC16 | chr1_114713909_G/T                  | Missense   | <i>NRAS</i>     | L02   | ETCLLDLDTAGKEEYSAMRDQYMR    |
| NIC16 | chr11_2270166_TTGC GCCGCTACGGCCGC/T | Frameshift | <i>ASCL2</i>    | L03   | RRPATAETGGGAMSASATA         |
| NIC16 | chr1_156956504_C/G                  | Missense   | <i>ARHGEF11</i> | L04   | NTYMSHAGIRLRDARPSNTEAKAQS   |
| NIC16 | chr11_65635326_C/A                  | Missense   | <i>PCNX3</i>    | L05   | RLVISHEGDPAWSSAINTSPSLLA    |
| NIC16 | chr12_123627113_A/G                 | Missense   | <i>EIF2B1</i>   | L06   | LTHAYSRVLRVPEAAVAAKKRFVS    |
| NIC16 | chr12_57769824_C/T                  | Missense   | <i>METTL1</i>   | L07   | RAAPAGGFQNIAYLRSNAMKHLPNF   |
| NIC16 | chr12_65169982_C/A                  | Missense   | <i>LEMD3</i>    | L08   | SLLGGPGGASAAHAAGSKVLLGFSS   |
| NIC16 | chr16_15724685_G/T                  | Missense   | <i>MYH11</i>    | L09   | LQDQLDEEMEAKNLERHISTLNIQ    |
| NIC16 | chr17_29583013_C/A                  | Missense   | <i>GIT1</i>     | L10.1 | TLLQMVHTLASNWANSIWEHSLDLP   |
|       |                                     |            |                 | L10.2 | MVHTLASNWANSIWEHSLDPAQVQ    |
| NIC16 | chr17_75836605_G/A                  | Missense   | <i>UNC13D</i>   | L11   | IRFRSVFPLSVLDSPARLQSLLRV    |
| NIC16 | chr17_79077832_T/G                  | Missense   | <i>ENGASE</i>   | L12.1 | PPLSSQRPTLLWHDDMMGGYLDRF    |
|       |                                     |            |                 | L12.2 | PPLSSQRPTLLWHDDMMGGYLLDRD   |
| NIC16 | chr19_57873985_A/T                  | Missense   | <i>ZNF814</i>   | L13   | VHAGERPFKCGESVSKFSHKRSLVH   |
| NIC16 | chr2_106843518_C/T                  | Missense   | <i>ST6GAL2</i>  | L14   | SHTQGTGFPSPREPGPREGAFPA     |
| NIC16 | chr2_130172479_C/A                  | Missense   | <i>SMPD4</i>    | L15   | LITQKPLPVSLHFRSDCAYFILVD    |
| NIC16 | chr2_238140762_G/A                  | Missense   | <i>KLHL30</i>   | L16   | MVQNVDDLDFHLPSPAQDMLDGLQR   |
| NIC16 | chr22_38699959_TTGT                 | Frameshift | <i>JOSD1</i>    | L17   | MSCVVPWKGEQI                |
| NIC16 | chr2_70088042_T/A                   | Missense   | <i>PCBP1</i>    | L18   | TNSTAASRPVPTQRLVVPATQCGSL   |
| NIC16 | chr5_112827969_TG/T                 | Missense   | <i>APC</i>      | L19   | LCSMKGCMRALVPN              |
| NIC16 | chr5_37726991_G/A                   | Missense   | <i>WDR70</i>    | L20   | KTDDSNPREAILHAKAAEDSPYVW    |
| NIC16 | chr6_33687091_G/A                   | Missense   | <i>ITPR3</i>    | L21   | DSENAERILISLQPLVDVVIKAY     |
| NIC17 | chr10_133370734_C/T                 | Missense   | <i>ECHS1</i>    | L01   | PFASGANFEYIIEKRGKNNVTGLI    |
| NIC17 | chr10_72935651_C/A                  | Missense   | <i>PLA2G12B</i> | L02   | TLGCRPFMNSQRAAFICAEKEEEL    |
| NIC17 | chr1_116589057_C/T                  | Missense   | <i>IGSF3</i>    | L03   | QVSKSKRTLTLVKNKIQIPLNCSVKS  |
| NIC17 | chr11_17169117_G/C                  | Missense   | <i>PIK3C2A</i>  | L04   | SYLPTPATPFHPGEGSLPIRVPVST   |
| NIC17 | chr11_2570678_G/C                   | Missense   | <i>KCNQ1</i>    | L05   | VVFFGTYYVRLCSAGCRSKYVGLW    |
| NIC17 | chr11_6683217_T/C                   | Missense   | <i>MIRPL17</i>  | L06   | FRRMGLGPESRILRLNLLTGLVRH    |
| NIC17 | chr1_26122123_T/C                   | Missense   | <i>PDIK1L</i>   | L07.1 | TSLEPTLKVADSGLSKVCASGQN     |
|       |                                     |            |                 | L07.2 | PDNILISQTRLDTSDLEPTLKVADS   |
| NIC17 | chr12_6750194_G/A                   | Missense   | <i>MLF2</i>     | L08.1 | GAPKVYQETSEMCSAPGGIRETRRT   |
|       |                                     |            |                 | L08.2 | GAPKVYQETSEMCSAPGGVSWGALL   |
| NIC17 | chr13_102821834_A/G                 | Missense   | <i>BIVM</i>     | L09   | FEDIRFGPFTGNATLMRWRFRQINDH  |
| NIC17 | chr13_30657546_C/T                  | Missense   | <i>USPL1</i>    | L10   | CSEHKKFEVPALEIHIVWERKIS     |
| NIC17 | chr14_21230984_T/A                  | Missense   | <i>HNRNPC</i>   | L11.1 | KRSAAEMYGSVTDHPSPLSSSF      |
|       |                                     |            |                 | L11.2 | KRSAAEMYGSVTDHPSPLSVYQ      |
| NIC17 | chr1_44802975_G/A                   | Missense   | <i>PLK3</i>     | L12   | SLGCVMYTLCCGNPFETADLKETY    |
| NIC17 | chr15_44651635_G/C                  | Missense   | <i>SPG11</i>    | L13   | ELKCVSVTGFTAVFTWEVERMGYTI   |
| NIC17 | chr15_68086601_C/T                  | Missense   | <i>PIAS1</i>    | L14   | PQLTYDGH PASLPPVSLGPKHE     |
| NIC17 | chr16_19699568_C/T                  | Missense   | <i>C16orf62</i> | L15   | FFNSILAHGDLNKNLQSLVNLW      |
| NIC17 | chr16_2175867_G/T                   | Missense   | <i>TRAF7</i>    | L16   | KIWDIRTLDCIHFLQTSGGSVYSIA   |
| NIC17 | chr1_6469615_G/A                    | Missense   | <i>PLEKHG5</i>  | L17   | TDLLLVTKAVKVERTRVIRPPLL     |
| NIC17 | chr16_67167533_C/T                  | Missense   | <i>HSF4</i>     | L18   | GLSPHRARGPIIFDIPEDSPSPEGT   |
| NIC17 | chr1_68137792_C/A                   | Missense   | <i>WLS</i>      | L19.1 | FLYAPSHKNYGEYQNGDLGVHSGE    |
|       |                                     |            |                 | L19.2 | FLYAPSHKNYGEYQNGMQLPCKSR    |
| NIC17 | chr17_82054677_G/A                  | Missense   | <i>GPS1</i>     | L20   | NYKGSIKESIRHGHDDLGDHYLDC    |
| NIC17 | chr18_58919969_C/T                  | Missense   | <i>ZNF532</i>   | L21   | QKIQAIINAALQPPKKS RVQV      |
| NIC17 | chr19_11021837_C/T                  | Missense   | <i>SMARCA4</i>  | L22   | NTHYVAPRRLMLMGTPQLNKLPELW   |
| NIC17 | chr19_3478879_C/T                   | Missense   | <i>SMIM24</i>   | L23   | LKPWLVLGLAAVVSFLFIVYLLLAN   |
| NIC17 | chr19_47680387_G/T                  | Missense   | <i>GLTSCR1</i>  | L24   | PQNLTFMAAGKAVQNVVLSGFPAPA   |
| NIC17 | chr19_55092787_G/A                  | Missense   | <i>PPP1R12C</i> | L25   | EHRKVGKEWRGPVVEEGEAEPADRSQ  |
| NIC17 | chr19_55482650_A/C                  | Missense   | <i>ZNF628</i>   | L26   | RDHTGERPYQCGACGKAFKRSSLLA   |
| NIC17 | chr20_63882783_G/C                  | Missense   | <i>TPD52L2</i>  | L27   | QAGQKTSAAALSTLGS AISRKLGDMR |
| NIC17 | chr3_136152028_C/A                  | Missense   | <i>MSL2</i>     | L28   | VLRSLTVSNTEFCPNLQPNLEAT     |
| NIC17 | chr3_45500451_C/A                   | Missense   | <i>LARS2</i>    | L29   | RYTDPHNPSPFKTAVADYWMVPVDL   |
| NIC17 | chr4_143538936_A/C                  | Missense   | <i>SMARCA5</i>  | L30   | DSDWNPQVDLQALDRAHRIGQTKTV   |

|       |                            |            |                  |       |                            |
|-------|----------------------------|------------|------------------|-------|----------------------------|
| NIC17 | chr4_76740029_C/A          | Missense   | <i>SHROOM3</i>   | L31   | QAQAWQAGEDKRYSLSEPWEGDFQ   |
| NIC17 | chr6_31888379_C/T          | Missense   | <i>EHMT2</i>     | L32   | ARMVKHHCCPGCDYFCTAGTFLECH  |
| NIC17 | chr7_117791275_C/A         | Missense   | <i>CTTNBP2</i>   | L33   | SALATSQVGAWPSATPGGLNQPACSD |
| NIC17 | chr7_135209655_C/T         | Missense   | <i>WDR91</i>     | L34   | DYWSYLERRFLSHLEDIYRPTIHKL  |
| NIC17 | chr7_143291622_T/A         | Missense   | <i>CASP2</i>     | L35   | KKNRVVLAKQLLMSLELLEHLEKDI  |
| NIC17 | chr7_4788195_C/A           | Missense   | <i>AP5Z1</i>     | L36   | APAASERPLWDTYLRAPSCLEAFRD  |
| NIC17 | chr7_5715168_C/T           | Missense   | <i>RNF216</i>    | L37   | EQYKQDGLIEHCCEYGEFFPELFT   |
| NIC17 | chr7_756863_A/T            | Missense   | <i>DNAAF5</i>    | L38   | VFLKLLSTLKKSPSASGLLVLSA    |
| NIC17 | chr7_99035681_G/C          | Missense   | <i>SMURF1</i>    | L39   | ELIIGLDKIDLKDWSNTRLKHCV    |
| NIC17 | chr9_131475787_G/A         | Missense   | <i>PRRC2B</i>    | L40   | RLSNCGYGRRTFISKESPHWQSKSP  |
| NIC17 | chr9_72916962_G/C          | Missense   | <i>ALDH1A1</i>   | L41   | FVRRSVERAKKYMGNPLTPGVQTG   |
| NIC17 | chr9_87706564_G/A          | Missense   | <i>DAPK1</i>     | L42   | CRWIHQSTEGDTRDLRWVNGKLA    |
| NIC17 | chrX_64921864_TC/T         | Frameshift | <i>ZC4H2</i>     | L43   | YKQEMDLLLQEKWPMWRNSD       |
| NIC20 | chr1_220157870_C/T         | Missense   | <i>RAB3GAP2</i>  | L1    | KSPKDLRDRDVRMSDTAMTSFLGS   |
| NIC20 | chr12_25245351_C/G         | Missense   | <i>KRAS</i>      | L2    | MTEYKLVVVGARGVGKSALTILQIL  |
| NIC20 | chr12_56324171_G/A         | Missense   | <i>PAN2</i>      | L3    | QAYRGAGGSFCSLGDVSVIGQLFSCE |
| NIC20 | chr12_6529892_G/T          | Missense   | <i>NCAPD2</i>    | L4    | DNFDCFGDKLSDSIFSAFLSVVGK   |
| NIC20 | chr12_6536969_G/A          | Missense   | <i>GAPDH</i>     | L5    | KIKWGDAGAEYVMESTGVFTTMEKA  |
| NIC20 | chr13_32339480_G/T         | Missense   | <i>BRCA2</i>     | L6    | IFDGGPERINTAYVGNLYENNSN    |
| NIC20 | chr17_58511460_G/A         | Missense   | <i>MTMR4</i>     | L7.1  | IDSVESRDMFQLYISCKDSKVVRCH  |
|       |                            |            |                  | L7.2  | SVINVPLRMIDSVESRDMFQLYISCK |
|       |                            |            |                  | L7.3  | RMIDSVESRDMFQLYISCKDSKVVR  |
|       |                            |            |                  | L8    | LEEKQRLEKIKLGGKIGKGTSTN    |
| NIC20 | chr17_67911137_G/A         | Missense   | <i>BPTF</i>      | L9    | GGLSLWIFTWACFPCTRQLRSS     |
| NIC20 | chr17_75960324_G/A         | Missense   | <i>ACOX1</i>     | L10   | VCACPRDRRTEKENLRKKGEPHHE   |
| NIC20 | chr17_7673764_C/T          | Missense   | <i>TP53</i>      | L11   | FEVRVCACPRDRWTEENLRKKGGE   |
| NIC20 | chr17_7673776_G/A          | Missense   | <i>TP53</i>      | L12   | IDQELVIPCPNCFASQPKVVRGRHF  |
| NIC20 | chr18_80135747_G/A         | Missense   | <i>ADNP2</i>     | L13   | ERSLRARKLTLRELALYKRRRTP    |
| NIC20 | chr19_46015404_C/A         | Missense   | <i>CCDC61</i>    | L14   | TDVGRPFTSGQTPVNIQELLGKNF   |
| NIC20 | chr19_57254563_T/C         | Missense   | <i>ZNF805</i>    | L15   | GAGLALSTAPALGETWSDVALPELD  |
| NIC20 | chr21_46389211_A/G         | Missense   | <i>PCNT</i>      | L16.2 | RNAMQIVGFMDHDAESVLAVVAAVL  |
| NIC20 | chr2_191363763_A/C         | Missense   | <i>MYO1B</i>     | L17.1 | LLLDKIQDESLNNEKNALQTPHL    |
| NIC20 | chr2_196995406_A/T         | Missense   | <i>ANKRD44</i>   | L17.2 | KCALLLDKIQDESLNNEKNALQTPH  |
|       |                            |            |                  | L18   | TEGDEEDATEAWCLHQKHVFLVSEA  |
| NIC20 | chr3_49911685_G/A          | Missense   | <i>MON1A</i>     | L19   | KTEANWVNVISDFKIEDLIQSMHI   |
| NIC20 | chr4_141721984_G/T         | Missense   | <i>IL15</i>      | L20   | ANSSDPTSGVSKHKSMSSTYEELD   |
| NIC20 | chr4_89113177_G/A          | Missense   | <i>TIGD2</i>     | L21   | DEIKQSEQRQSRNQSTTYPFILCLY  |
| NIC20 | chr5_112838822_T/TGTTTACTG | Frameshift | <i>APC</i>       | L22   | AQTKREVPKNKAPTAEKRVDSLKLQ  |
| NIC20 | chr5_112839978_AAGAG/A     | Frameshift | <i>APC</i>       | L23   | GSASVQLVLRVSTLVYERQTAMAV   |
| NIC20 | chr5_176577513_G/A         | Missense   | <i>CDHR2</i>     | L24   | DVIQTHLDKCMKLYKTLKSNLKWKL  |
| NIC20 | chr6_144493316_TTGAG/T     | Frameshift | <i>UTRN</i>      | L25   | MYGATQSQDMCGDQDCIQSTKFLV   |
| NIC20 | chr6_157672728_A/G         | Missense   | <i>ZDHHC14</i>   | L26   | GPEEAGSVRRYTHLFTSTPAEGAS   |
| NIC20 | chr7_102637557_C/T         | Missense   | <i>UPK3BL1</i>   | L27.1 | NVTVSRVNHVFFSGCAGKPRASHR   |
| NIC20 | chr7_152176502_G/GA        | Frameshift | <i>KMT2C</i>     | L27.2 | VSRVNHVFFSGCAGKPRASRSINS   |
|       |                            |            |                  | L28   | LQPIGLTYQFSELYFLASLFWPEN   |
| NIC20 | chr9_93101806_G/A          | Missense   | <i>SAMD9</i>     | L29   | KHEKRMSKDEERTVKDELLSEKPEI  |
| NIC20 | chr9_14307385_C/T          | Missense   | <i>NFIB</i>      | L30   | LATLHGSNMKWSTAVLWALGFILF   |
| NIC20 | chrM_6909_G/A              | Missense   | <i>MT-CO1</i>    | L01   | PVQMPDTPSDLVCHTTTLPSSHEI   |
| NIC22 | chr1_1917159613_G/A        | Missense   | <i>ZBTB41</i>    | L02   | SEKDFHYSDDDAVEADSEGADEPCD  |
| NIC22 | chr1_218302341_A/G         | Missense   | <i>RRP15</i>     | L03   | FKSGSLAVDNADTLKIPFASLARS   |
| NIC22 | chr1_99884678_C/A          | Missense   | <i>AGL</i>       | L04   | FEDKQRRKTEWFTLESKQKRIKNR   |
| NIC22 | chr10_118040557_C/G        | Missense   | <i>RAB11FIP2</i> | L05   | RELKPEEPENKPTAAATARRSKR    |
| NIC22 | chr10_132405164_G/A        | Missense   | <i>PWWP2B</i>    | L06   | GSGAGSGSAREDWLFKWTNYIKGY   |
| NIC22 | chr11_59615387_C/T         | Missense   | <i>OSBP</i>      | L07   | YTEGLHENGVCSDPGLSLGVSNGGG  |
| NIC22 | chr11_68157926_GAA/G       | Frameshift | <i>KMT5B</i>     | L08   | SCGHGGVNVNISKLSVQLNWRGFSY  |
| NIC22 | chr13_53050008_C/T         | Missense   | <i>OLFM4</i>     | L09   | DGARLEGDLSLAEKDVATAKDSKFKM |
| NIC22 | chr14_104945557_G/T        | Missense   | <i>AHNAK2</i>    | L10   | KEEDIEVPKAMGVIFESLAGAIYMD  |
| NIC22 | chr14_95091301_T/A         | Missense   | <i>DICER1</i>    | L11   | SAAPGSLGYQLWLDGSGVFEIAEAS  |
| NIC22 | chr16_3677504_G/A          | Missense   | <i>TRAP1</i>     | L12   | TLGAFGHEEEVICNPLSPRVIQNI   |
| NIC22 | chr16_47669255_C/G         | Missense   | <i>PHKB</i>      | L13   | IRFYGEKPCHEMCDLDRILLSGIYV  |
| NIC22 | chr16_71690689_G/A         | Missense   | <i>PHLPP2</i>    | L14   | QQQQKQLPQTPLSCLKTEIMSPLY   |
| NIC22 | chr17_63821516_G/A         | Missense   | <i>FTSJ3</i>     | L15   | SQWNSNDLVEQIKTMGLKDEHQFEGG |
| NIC22 | chr17_6525386_C/T          | Missense   | <i>PITPNM3</i>   | L16.1 | YMCNSSCMGGMNWRPILITITLEDSD |
| NIC22 | chr17_7674221_G/A          | Missense   | <i>TP53</i>      | L16.2 | EVGSDCTIHYNYMCNSSCMGGMNWR  |
|       |                            |            |                  | L17   | SPPLSTTTTARPMPLTSTASPAATT  |
| NIC22 | chr19_14161578_G/A         | Missense   | <i>ADGRL1</i>    | L18   | NISWDYIHYTDNQPTLDLALKPMS   |
| NIC22 | chr2_127584256_G/A         | Missense   | <i>MYO7B</i>     | L19   | RVLFPKGTTEVQDLALCYGGMANRT  |
| NIC22 | chr2_31377127_C/A          | Missense   | <i>XDH</i>       | L20   | DLVKKLLVDPKGRFTTEEARLHPW   |
| NIC22 | chr22_28694075_G/C         | Missense   | <i>CHEK2</i>     | L21   | GSFIRLIDAFKGMVMTHTFGGYANSA |
| NIC22 | chr3_52259737_C/T          | Missense   | <i>WDR82</i>     | L22.1 | LNKGLPLGVRPPMMNGPLHPRPLVA  |
| NIC22 | chr4_1238321_G/C           | Missense   | <i>CTBP1</i>     | L22.2 | MSGVRPPMMNGPLHPRPLVALLDGR  |

|       |                             |                   |                |       |                            |
|-------|-----------------------------|-------------------|----------------|-------|----------------------------|
| NIC22 | chr5_112839525_A/AG         | Frameshift        | <i>APC</i>     | L22.3 | MCRRLSDGVRPPMMNGPLHPRPLVA  |
| NIC22 | chr5_57249510_G/T           | Missense          | <i>GPBP1</i>   | L23   | EADSANTLQIAIEIKESSIGLQKIL  |
| NIC22 | chr6_118829150_C/T          | Missense          | <i>MCM9</i>    | L24   | LTRMRTDKKSEFFKALKRDRVEEHEH |
| NIC22 | chr7_45104146_C/T           | Missense          | <i>TBRG4</i>   | L25   | DPQESVSVNIALSSPLSRFDLILV   |
| NIC22 | chr9_23701494_C/T           | Missense          | <i>ELAVL2</i>  | L26   | TSGEVAHCAKSFTLLKWLSLPLFEA  |
| NIC22 | chrM_11031_G/GA             | Frameshift        | <i>MT-ND4</i>  | L27   | GQKPPGATEPITIKFANNPSQKTNQ  |
|       |                             |                   |                | L28.1 | RHLSSEPLSRKKTLPYTNLPTNLL   |
|       |                             |                   |                | L28.2 | LSRKKTLPLYTNLPTNLLNLYNIHSH |
| NIC22 | chrM_15731_G/A              | Missense          | <i>MT-CYB</i>  | L29   | FRPLSQSLYWLTLADLLIITWIGGQ  |
| NIC22 | chrM_9715_G/A               | Missense          | <i>MT-CO3</i>  | L30   | QMIQALLITILLDLYFTLLQASEYF  |
| NIC25 | chr10_132777741_C/T         | Missense          | <i>INPP5A</i>  | L01   | QYMNTRCPAWCDCILMSPSAKELVL  |
| NIC25 | chr10_34470134_C/G          | Missense          | <i>PARD3</i>   | L02   | SRKNPTRWSTTAALFKNCQTAGSPKT |
| NIC25 | chr11_107433697_T/A         | Missense          | <i>CWF19L2</i> | L03   | DGGLSWLRKSYLSMKEQAEKQSRNF  |
| NIC25 | chr11_72014750_C/T          | Missense          | <i>NUMA1</i>   | L04   | QEKMAATSKEVAHLETLVKAGEQQ   |
| NIC25 | chr12_131913767_C/T         | Missense          | <i>ULK1</i>    | L05   | SLMCSGSSLVASVGLSHGRTPSPS   |
| NIC25 | chr1_21847754_C/T           | Missense          | <i>HSPG2</i>   | L06   | VEGQTLDLNLCVTRQQAIIHWYKR   |
| NIC25 | chr12_25245350_C/A          | Missense          | <i>KRAS</i>    | L07   | MTEYKLVVVGAVGVGKSALTIQLIQ  |
| NIC25 | chr1_243191320_C/G          | Missense          | <i>CEP170</i>  | L08   | STIHEIPTKDTPTSHITGAGHASF   |
| NIC25 | chr12_56088072_C/T          | Missense          | <i>ERBB3</i>   | L09   | NDSGACVPRCQSLVYNKLTFLQEP   |
| NIC25 | chr13_75286844_C/T          | Missense          | <i>TBC1D4</i>  | L10   | PADALVNCDLLKDLNCNPNNKAKI   |
| NIC25 | chr14_24338294_A/C          | Missense          | <i>RIPK3</i>   | L11   | NRKASTASDVSVGLMWAVLAGRE    |
| NIC25 | chr16_75656305_GGAA/G       | Inframe deletion  | <i>TERF2IP</i> | L12.1 | ETQPDEEEEEEEKVSQPEVGAAIKI  |
| NIC25 |                             |                   |                | L12.2 | ETQPDEEEEEEEKVSQPEVSISSQS  |
| NIC25 | chr17_20205400_G/GT         | Frameshift        | <i>SPECC1</i>  | L13   | HRERAELQSQENEKLMNLLQERVKE  |
| NIC25 | chr17_7673607_TGCTA/T       | Splice            | <i>TP53</i>    | L14.1 | PHHELPPGSTKRGKQAGQEAVEETK  |
| NIC25 |                             |                   |                | L14.2 | KQAGQEAVEETKGAVMPIHFYHLS   |
| NIC25 |                             |                   |                | L14.3 | AVMPQIHFYHLSPLFTAQQHQLLS   |
| NIC25 |                             |                   |                | L14.4 | QHQLLSPAKEETGWRIFHPSDPWA   |
| NIC25 |                             |                   |                | L14.5 | PLFTAQQHQLLSPAKEETGWRIFH   |
| NIC25 | chr19_35738445_G/A          | Missense          | <i>IGFLR1</i>  | L15   | EGQKHIVIFALRHILRGEELTYDYK  |
| NIC25 | chr19_4524976_C/T           | Missense          | <i>PLIN5</i>   | L16   | LWGEWGWQRPESHRRSQALETLLV   |
| NIC25 | chr19_46778729_C/T          | Missense          | <i>SLC1A5</i>  | L17   | LIYFLTRKNPYHFLWGVITPLATA   |
| NIC25 | chr20_38156089_C/T          | Missense          | <i>TGM2</i>    | L18   | ASVDSLTSVVDTPAPSQEAGTKAR   |
| NIC25 | chr20_41484523_C/T          | Missense          | <i>CHD6</i>    | L19   | KDDVEKNLAPKQKTIIEVELTNIQK  |
| NIC25 | chr20_50891831_A/C          | Missense          | <i>ADNP</i>    | L20   | MHNASDSEVDQDEVVWKGDSGPSE   |
| NIC25 | chr20_63930879_C/T          | Missense          | <i>DNAJC5</i>  | L21   | WAKALFVFCGLLMCCYCCCLCCFC   |
| NIC25 | chr2_230467207_G/T          | Missense          | <i>SP100</i>   | L22   | AEASSGALRSKHVEKAPMSTRSTST  |
| NIC25 | chr22_35334417_C/T          | Missense          | <i>TOM1</i>    | L23   | RLEDEFDMFALTWVGSSLADQRKEVK |
| NIC25 | chr22_40266865_T/TC         | Frameshift        | <i>TNRC6B</i>  | L24   | SSGPQPATPKDEEPSGWEEPSPTVN  |
| NIC25 | chr2_86478667_A/G           | Missense          | <i>KDM3A</i>   | L25   | VHSVRAKWGKADCPNSRQFKLFS    |
| NIC25 | chr3_24146684_C/T           | Missense          | <i>THRB</i>    | L26.1 | ECRFKKCIYVGMTTDLVLDSKRLA   |
| NIC25 |                             |                   |                | L26.2 | QECRFKKCIYVGMTTDCHTFIKKWP  |
| NIC25 | chr4_147654416_C/T          | Missense          | <i>PRMT9</i>   | L27   | KSFTQNKDLLSENAELCSALANL    |
| NIC25 | chr4_733979_G/T             | Missense          | <i>PCGF3</i>   | L28.1 | SEKSFHAKGPVGVVRAEASLRRAK   |
| NIC25 |                             |                   |                | L28.2 | QKSHFTLKVLLVLSSEQMRPLRGERN |
| NIC25 | chr4_8607369_G/A            | Missense          | <i>CPZ</i>     | L29   | LHGGDLVSVYPFNFSKHPQEKMF5   |
| NIC25 | chr5_112840204_CAG/C        | Frameshift        | <i>APC</i>     | L30   | QKDVELRIMPPVQENDNGNETIRAA  |
| NIC25 | chr5_136063199_A/G          | Missense          | <i>TGFB1</i>   | L31   | ELADSALEIFKQASAFSRPLSIRSY  |
| NIC25 | chr5_141384779_G/A          | Missense          | <i>PCDHGA2</i> | L32   | GLFAVGLYTGCVHTARALLDRDALK  |
| NIC25 | chr5_180948367_C/T          | Missense          | <i>BTNL8</i>   | L33   | KIFFSKFQWKIQVELDWRKKGQAE   |
| NIC25 | chr6_139166833_C/CCACGGGCTA | Inframe insertion | <i>HECA</i>    | L34.1 | GGSPGQSPPTGYTGYLSILPAHFSG  |
| NIC25 |                             |                   |                | L34.2 | GSPGQSPPTGYTGYLSILPAHFSGP  |
| NIC25 |                             |                   |                | L34.3 | SPGQSPPTGYTGYLSILPAHFSGPR  |
| NIC25 | chr7_158167215_C/T          | Missense          | <i>PTPRN2</i>  | L35   | AHTSALTYPPGQSTQLREDLLPRTL  |
| NIC25 | chr8_126556693_G/T          | Missense          | <i>FAM84B</i>  | L36   | LRIGKQPYRLQIKLSAQRSHLTFEQ  |
| NIC25 | chr9_83970226_G/A           | Missense          | <i>HNRNPK</i>  | L37   | IKIDEPLEGSEDIITITGTQDQIQ   |
| NIC25 | chrX_71250094_G/A           | Missense          | <i>ZMYM3</i>   | L38   | SVCLSLYEAQQCPQPQSGDPADAT   |
| NIC27 | chr10_87170897_A/T          | Missense          | <i>SHLD2</i>   | L1    | GQKQKVMMLTVELAQDQHYALVLWG  |
| NIC27 | chr1_114716126_C/T          | Missense          | <i>CSDE1</i>   | L2    | MTEYKLVVVGADGVGKSALTIQLIQ  |
| NIC27 | chr11_46778488_C/T          | Missense          | <i>CKAP5</i>   | L3    | DGDEPDGSDNDVILLPRTEISDKI   |
| NIC27 | chr1_202012640_A/AC         | Frameshift        | <i>ELF3</i>    | L4.1  | AFQEALDPGPFDPGQPLCPGAAGR   |
|       |                             |                   |                | L4.2  | PGQPLCPGAAGRASQPLPRQLW     |
|       |                             |                   |                | L4.3  | AGRRASQPLPRQLWRRSPLPWQL    |
| NIC27 | chr1_237658004_C/A          | Missense          | <i>RYR2</i>    | L5    | EYFINKYAEHSHEKWSMDKLANGWI  |
| NIC27 | chr14_45006152_G/A          | Missense          | <i>KLHL28</i>  | L6    | RGISLLPKADLNTVGHKKKEPDDI   |
| NIC27 | chr16_12069072_G/T          | Missense          | <i>SNX29</i>   | L7    | VGSYSPADAPLIGLENGTGPEDHVL  |
| NIC27 | chr16_3138989_G/T           | Missense          | <i>ZNF213</i>  | L8.1  | TCFVSGVHGPFVAFGDIPFYFSREEW |
| NIC27 | chr16_3138989_G/T           | Missense          | <i>ZNF213</i>  | L8.2  | QEQSHSGTGTGIWRHPILFLPGRMG  |
| NIC27 | chr19_3738627_G/A           | Missense          | <i>TJP3</i>    | L9    | EAVQFLGLLPPGKEMELVYTRKQDI  |
| NIC27 | chr19_49867076_G/T          | Missense          | <i>PNKP</i>    | L10.1 | LVLGRGPLTQVTERKCSRTQVELVA  |
|       |                             |                   |                | L10.2 | DGQALVLRGRLTQVTERKCSRTQA   |

|       |                      |            |                |        |                            |
|-------|----------------------|------------|----------------|--------|----------------------------|
| NIC27 | chr20_63590574_C/T   | Missense   | <i>GMEB2</i>   | L11    | RPRLARATSGPATMASQVLTQSAQL  |
| NIC27 | chr2_170846011_G/T   | Missense   | <i>GAD1</i>    | L12    | TDNVILIKCNERVKIIPADFEAKIL  |
| NIC27 | chr3_15074555_G/A    | Missense   | <i>RBSN</i>    | L13    | DLQREQLQMLREWELELEREQFRVA  |
| NIC27 | chr3_151199322_T/TA  | Frameshift | <i>MED12L</i>  | L14.1  | VYKDLEPFTYFFLFSFPCWNYWKL   |
|       |                      |            |                | L14.2  | FSFPCWNYWKLFCNLGFYTEYESQ   |
|       |                      |            |                | L14.3  | YWKLFCLNGFYTEEYESQVCEHLLN  |
| NIC27 | chr3_97877501_G/A    | Missense   | <i>CRYBG3</i>  | L15    | DDSSQEDILSSEISPGHHGPRKSRD  |
| NIC27 | chr4_17501822_GCT/G  | Frameshift | <i>QDPR</i>    | L16.1  | SLFKNCDLMWQHMIDHDLQKGCPCG  |
|       |                      |            |                | L16.2  | MDIDHLQKGCPCGWDSWYDRVRHGQG |
|       |                      |            |                | L16.3  | WDSWYDRVRHGQGCCSPALPEPGWE  |
|       |                      |            |                | L16.4  | GCCSPALPEPGWEEQRHAARGSRHR  |
|       |                      |            |                | L16.5  | EQRHAARGSRHRCAPGYPGPDEQE   |
|       |                      |            |                | L16.6  | HAARGSRHRCAPGYPGPDEQEINA   |
|       |                      |            |                | L16.7  | SLFKNCDLMWQHMIDHDLQPSGYQ   |
|       |                      |            |                | L16.8  | MDIDHLQPSGYQASQGRPPDLGWR   |
|       |                      |            |                | L16.9  | ASQGRPPDLGWRKGCPCGWDSWVTL  |
|       |                      |            |                | L16.10 | RPPDLGWRKGCPCGWDSWVTLDTMP  |
| NIC27 | chr4_17813010_G/A    | Missense   | <i>NCAPG</i>   | L17    | LLGSMPENAQIDNDVDFKINKAMLI  |
| NIC27 | chr4_8235554_G/A     | Missense   | <i>SH3TC1</i>  | L18    | GAWEREKAVSFYQDRALPLAVTTGN  |
| NIC27 | chr4_9890687_G/A     | Missense   | <i>SLC2A9</i>  | L19    | AVFSGLVIEHLGWRPLLIGGFLMG   |
| NIC27 | chr5_150204571_G/A   | Missense   | <i>SLC6A7</i>  | L20    | GMYWLVLLDDYSTSFLGLMVVVITC  |
| NIC27 | chr6_33711605_C/A    | Missense   | <i>UQCC2</i>   | L21    | WPVDETKRGRDLCAYLRRQVAQAFR  |
| NIC27 | chr7_98984093_C/T    | Missense   | <i>TRRAP</i>   | L22.1  | SSFWMWRQHYYQVIVTAYENSSQHD  |
|       |                      |            |                | L22.2  | QGKPTWSGMHSSLIVTAYENSSQHD  |
| NIC27 | chr8_144057495_G/T   | Missense   | <i>OPLAH</i>   | L23    | PLSLEEVAMGFVSVANEAMCRPIRA  |
| NIC27 | chr8_144360298_A/G   | Missense   | <i>FBXL6</i>   | L24    | AAGTTPGDPKACQLLSARSACLLG   |
| NIC27 | chr8_28160331_C/T    | Missense   | <i>ELP3</i>    | L25    | PDQDILIGLLRLCKCSEETFRFELG  |
| NIC27 | chr8_39918906_C/A    | Missense   | <i>IDO1</i>    | L26.1  | LPILVYADCLENWKKKDPNKYVN    |
|       |                      |            |                | L26.2  | LPILVYADCLENWKKKDPNKPLT    |
| NIC38 | chr1_114713909_G/T   | Missense   | <i>NRAS</i>    | L01    | ETCLLDILDTAGKEEYSAMRDQYMR  |
| NIC38 | chr1_155187338_G/C   | Missense   | <i>MUC1</i>    | L02.1  | AVCQCRRNKYGQVDFIPARDTYHPM  |
|       |                      |            |                | L02.2  | GCLSVPPKELRAGHLLSSPGYLPY   |
|       |                      |            |                | L02.3  | WLSVSAAEERTTGRWTSFQGPITIL  |
| NIC38 | chr1_204968350_G/A   | Missense   | <i>NFASC</i>   | L03    | VLRGMDLLELCITSGVPTPIAWYK   |
| NIC38 | chr1_52359809_G/A    | Missense   | <i>CC2D1B</i>  | L04    | SAQPVSDLDPDPWALLSSRQREYKV  |
| NIC38 | chr10_127439193_C/A  | Missense   | <i>DOCK1</i>   | L05    | FEKEFKPTDISLKQSEAVILSETIS  |
| NIC38 | chr10_87790413_T/C   | Missense   | <i>ATAD1</i>   | L06    | VDPLNMHVWSDMAGLDDVITDLKD   |
| NIC38 | chr11_114407658_C/T  | Missense   | <i>RBM7</i>    | L07    | PYLADRHYSRECYCTDHGSDHHYRG  |
| NIC38 | chr11_68934473_G/A   | Missense   | <i>IGHMBP2</i> | L08    | EDEQSKGNPGEVHLVSLHIQALVDA  |
| NIC38 | chr11_75796404_G/A   | Missense   | <i>DGAT2</i>   | L09    | IFGYHPHGMGLDAFCNFSTEATEV   |
| NIC38 | chr12_100623662_C/T  | Missense   | <i>GAS2L3</i>  | L10    | LLKYDPCRILQFVTLQKILAFKQK   |
| NIC38 | chr12_25245347_C/T   | Missense   | <i>KRAS</i>    | L11    | MTEYKLVVVGAGDVGKSAITLIQLQ  |
| NIC38 | chr12_50474099_C/T   | Missense   | <i>LARP4</i>   | L12.1  | TTIPVSPSTTKSSRASTASPCNNN   |
| NIC38 | chr12_50474099_C/T   | Missense   | <i>LARP4</i>   | L12.2  | TTIPVSPSTTKSSREPRKLSYAEV   |
| NIC38 | chr12_57268355_C/T   | Missense   | <i>R3HDM2</i>  | L13    | VSQSVQGGLPAAARVYVYMSIPPAQ  |
| NIC38 | chr12_6974548_TCA/T  | Splice     | <i>EMG1</i>    | L14.1  | NGRDPGEARPDITHQTPGTVLTL    |
|       |                      |            |                | L14.2  | DPGEARPDITHQVYIHTQKNVLEIV  |
|       |                      |            |                | L14.3  | YIHTQKNVLEIVNPQTRIPRTDFR   |
|       |                      |            |                | L14.4  | PQTRIPRTDFRFGCLMVQLLHKLVS  |
|       |                      |            |                | L14.5  | GLMVQLLHKLVSRAADGPQKLLKVI  |
|       |                      |            |                | L14.6  | ILLKNGRDPGEARPDITHQFADADG  |
| NIC38 | chr13_24883229_C/T   | Missense   | <i>CENPJ</i>   | L15    | ANGHQETKYRSGQIRVKDKEGNVLM  |
| NIC38 | chr14_64948446_G/A   | Missense   | <i>RAB15</i>   | L16    | QAHRKELEGRMCASNELALAELEE   |
| NIC38 | chr16_2117882_G/T    | Missense   | <i>PKD1</i>    | L17    | ALELVCPSSVQSEESLDLSIQKQK   |
| NIC38 | chr17_42670596_C/T   | Missense   | <i>PLEKHH3</i> | L18    | PLHPEGLSPDGHKLPFLFEQAHAL   |
| NIC38 | chr17_47292436_G/A   | Missense   | <i>ITGB3</i>   | L19    | QQDECSPREGQPICSRQGECLCGQC  |
| NIC38 | chr17_72124031_TC/T  | Frameshift | <i>SOX9</i>    | L20    | PQAHTLTLTSSPEPQSSERTSRSS   |
| NIC38 | chr17_7674229_C/A    | Missense   | <i>TP53</i>    | L21.1  | HNYNYMCNSSCMGMNRRPILTIITL  |
|       |                      |            |                | L21.2  | EVGSDCTTIHNYNYMCNSSCMGMNRR |
| NIC38 | chr17_81811574_G/A   | Missense   | <i>GCGR</i>    | L22    | VSTWLSDGVSPQRPQAGGWVGSQA   |
| NIC38 | chr18_25226861_A/T   | Missense   | <i>ZNF521</i>  | L23    | SNPSPLVTVGYTTVSTTPDSNLSV   |
| NIC38 | chr18_50275897_C/T   | Missense   | <i>MBD1</i>    | L24    | GACSTLLQLPHNVASGLFCKCERR   |
| NIC38 | chr19_3981442_G/A    | Missense   | <i>EEF2</i>    | L25    | QLILDPIFKVDFVIMNFKKEETAKL  |
| NIC38 | chr19_44288724_G/T   | Missense   | <i>ZNF235</i>  | L26    | DDNIVHKRDKVHRNSDCGKDTLKVS  |
| NIC38 | chr19_49168357_G/GGT | Frameshift | <i>TRPM4</i>   | L27.1  | RDHQMASTGGTKWWWVWVWPPGVWS  |
|       |                      |            |                | L27.2  | WWWVWVWVWVWVWVWVWVWVWVW    |
|       |                      |            |                | L27.3  | IETPSSTPRARSLRGTGGAVTRRTG  |
|       |                      |            |                | L27.4  | RGTGGAVTRRTGSSFPWTTTTRPSS  |
|       |                      |            |                | L27.5  | SFPWTTTTRPSSWTTAHTAAWGAR   |
|       |                      |            |                | L27.6  | WTTAHTAAWGARTASACAWSPTS    |
|       |                      |            |                | L27.7  | ASACAWSPTS                 |

|       |                             |                   |                  |        |                            |
|-------|-----------------------------|-------------------|------------------|--------|----------------------------|
|       |                             |                   |                  | L27.8  | AWSPTSHSRRRAWEGLELTSLSCSS  |
|       |                             |                   |                  | L27.9  | GPSDGGHWHGQGVVAMGVAPWGVVR  |
|       |                             |                   |                  | L27.10 | PSDGGHWHGQGVVAMGVAPWGVVRN  |
|       |                             |                   |                  | L27.11 | GTIRWPALGAPRCGGHGGCPLGCGP  |
|       |                             |                   |                  | L27.12 | TIRWPALGAPRCGGHGGCPLGCGPE  |
| NIC38 | chr19_49909636_C/T          | Missense          | <i>NUP62</i>     | L28    | APFQPATSTPSTLFLSATQTPTAQ   |
| NIC38 | chr19_54192199_A/G          | Missense          | <i>TSEN34</i>    | L29    | PRSALLQLATAGPRPVKARPLDWR   |
| NIC38 | chr2_132785077_C/A          | Missense          | <i>NCKAP5</i>    | L30    | QGQGHGRMALNLHSDTDDNETFDE   |
| NIC38 | chr2_218740117_T/C          | Missense          | <i>TLL4</i>      | L31    | DQAETEDTEELADGLEDCSARDEN   |
| NIC38 | chr2_25243924_A/T           | Missense          | <i>DNMT3A</i>    | L32    | PVPAEKRPKIRVQSLFDGIATGLLV  |
| NIC38 | chr2_54850185_G/A           | Missense          | <i>EML6</i>      | L33    | WSLDSKYLQTNDSAGERLFYRMPG   |
| NIC38 | chr2_70088042_T/G           | Missense          | <i>PCBP1</i>     | L34    | TNSTAASRPPVTRRLVVPATQCGSL  |
| NIC38 | chr20_25207212_G/A          | Missense          | <i>ENTPD6</i>    | L35    | GVFIYVAYIKWHQATATQAFFSITR  |
| NIC38 | chr20_38558332_C/T          | Missense          | <i>RALGAPB</i>   | L36    | EPANSRLPPHLLVDSTIPGFFDDI   |
| NIC38 | chr20_58909366_G/A          | Missense          | <i>GNAS</i>      | L37    | DYVPSDQDLRCHVLTSGIFETKFKQ  |
| NIC38 | chr22_41176347_G/A          | Missense          | <i>EP300</i>     | L38    | PDPLIPCDLMDGGDFLTLARDKHL   |
| NIC38 | chr22_41604044_C/T          | Missense          | <i>DESI1</i>     | L39    | LEYLSSLGESLFQGEAYNLFEHNCN  |
| NIC38 | chr3_50276335_C/T           | Missense          | <i>SEMA3B</i>    | L40    | QVLAERTERTAWGLLRLRRRDS     |
| NIC38 | chr3_77577541_A/G           | Missense          | <i>ROBO2</i>     | L41    | PQSVTVLTVGSSYSSTISVSWDPPP  |
| NIC38 | chr4_75969346_C/T           | Missense          | <i>SDAD1</i>     | L42    | LKQLECKERFEMKMMMLNLSRLV    |
| NIC38 | chr5_112839514_TAAAAG/T     | Frameshift        | <i>APC</i>       | L43    | IGCNQTTQEASANTLQIAEIKDWN   |
| NIC38 | chr5_140835112_C/A          | Missense          | <i>PCDHA7</i>    | L44    | TVLDNNDNAPVFERTLYTVKLPENV  |
| NIC38 | chr5_14610204_T/A           | Missense          | <i>OTULINL</i>   | L45    | LEVKIKVFRFKINSRDFEVCYPEE   |
| NIC38 | chr7_100684319_G/A          | Missense          | <i>GIGYF1</i>    | L46    | SPPPLLGNMDQEWLKKQQLAAAL    |
| NIC38 | chr7_1496228_C/T            | Missense          | <i>INTS1</i>     | L47    | ERFVVHITDVLAMSMMLGITAQVKE  |
| NIC38 | chr7_155803327_C/T          | Missense          | <i>SHH</i>       | L48    | VRPGQRVVVAEHGDRLRLLPAVH    |
| NIC38 | chr7_5388319_G/A            | Missense          | <i>TNRC18</i>    | L49    | AAKLFGLPEGRPLPTGPEHKWKPF   |
| NIC38 | chr7_98229051_C/T           | Missense          | <i>TECPR1</i>    | L50    | HTAWVYTGYYGSGCFQGLASSTNI   |
| NIC38 | chr8_121617152_C/G          | Missense          | <i>HAS2</i>      | L51    | MLDPASSVEMVKLLEEDPMVGGVGG  |
| NIC38 | chr9_106925857_C/T          | Missense          | <i>ZNF462</i>    | L52    | SSLPLENETDSHSSSNTVKKSQTS   |
| NIC38 | chr9_93289156_G/A           | Missense          | <i>WNK2</i>      | L53    | CTPAPEAASRTDTSAPREPLPPAP   |
| NIC38 | chr1_203347520_T/TGTACAGCTG | Inframe insertion | <i>FMOD</i>      | L54.1  | PDGLPSALEQLYSCTMEHNNVYTP   |
| NIC39 | chr10_118039249_C/T         | Missense          | <i>RAB11FIP2</i> | L01    | LPRKKNPFEESSKTWDSMNLFSKP   |
| NIC39 | chr11_19933968_A/G          | Missense          | <i>NAV2</i>      | L02    | GIPKPGMKSMGRSPAPAPSKEGE    |
| NIC39 | chr1_144424696_C/T          | Missense          | <i>NBPF15</i>    | L03    | ALEEKHVGFSLDMGEIEKKGKGGKR  |
| NIC39 | chr1_19186599_G/A           | Missense          | <i>UBR4</i>      | L04    | RKGSMSDASASIDSNITYEDDFS    |
| NIC39 | chr11_93700058_C/A          | Missense          | <i>CEP295</i>    | L05    | QQDNLGLQKLDIQREVLHYSQKAQ   |
| NIC39 | chr1_202013255_CAA/C        | Frameshift        | <i>ELF3</i>      | L06.1  | GKRKRGRPKRSLRVGLSRGQEEQA   |
|       |                             |                   |                  | L06.2  | VLGLSRGQEEQARAQRHPPVGVHPG  |
|       |                             |                   |                  | L06.3  | AQRHPPVGVHPGHPHPGAQRGPHE   |
|       |                             |                   |                  | L06.4  | PVGVHPGHPHPGAQRGPHEVGESA   |
| NIC39 | chr12_121453254_G/A         | Missense          | <i>KDM2B</i>     | L07    | LAANRTTAGARRCRTCRCACEALR   |
| NIC39 | chr12_25245350_C/A          | Missense          | <i>KRAS</i>      | L08    | MTEYKLVVVGAVGVGKSALTQLIQ   |
| NIC39 | chr12_58879049_C/T          | Missense          | <i>LRIG3</i>     | L09    | TPMDLIRAGAMTRLECAAVGHPAP   |
| NIC39 | chr13_19659265_T/A          | Missense          | <i>MPHOSPH8</i>  | L10    | GDYITVKVALNSKEEYNLDQEDSSG  |
| NIC39 | chr14_104171738_C/T         | Missense          | <i>KIF26A</i>    | L11    | NPGSIGVKVMLWVPAQGAQRSAE    |
| NIC39 | chr14_22902052_C/CGGT       | Inframe insertion | <i>RBM23</i>     | L12    | QLPSTAAAAAAPAAQAAALQNGA    |
| NIC39 | chr1_46272733_G/A           | Missense          | <i>RAD54L</i>    | L13    | YKRFRLQAKPAEKLEGGKMSVSSLS  |
| NIC39 | chr14_88792343_T/C          | Missense          | <i>EML5</i>      | L14    | GVGVVYSPREHRRKRYRSHSDDIIS  |
| NIC39 | chr15_34982598_C/A          | Missense          | <i>ZNF770</i>    | L15    | QGGFENGEIGESDENLPLDQVSIYI  |
| NIC39 | chr16_22534398_C/T          | Missense          | <i>NPIP5</i>     | L16    | PLPPSADDNLKTLSEKQLTLPPLPSA |
| NIC39 | chr16_549404_C/T            | Missense          | <i>CAPN15</i>    | L17    | EGAYQVRLCKDGMWTTVLVDDMLPC  |
| NIC39 | chr16_58267555_A/G          | Missense          | <i>CCDC113</i>   | L18    | DKEILLRKEELLERIEKETLQVEEDR |
| NIC39 | chr16_90006391_G/A          | Missense          | <i>DBNDD1</i>    | L19    | QSHKQPLGDPWQATVLDLFTLVE    |
| NIC39 | chr17_47292436_G/A          | Missense          | <i>ITGB3</i>     | L20    | QQDECSPREGQPCSRGECLECGQC   |
| NIC39 | chr17_51041572_C/T          | Missense          | <i>SPAG9</i>     | L21    | GDGLLTPDAQGRETPGSEQWKFQE   |
| NIC39 | chr17_7675088_C/T           | Missense          | <i>TP53</i>      | L22    | YKQSQHMTVEVVRHCPHERCSDSDG  |
| NIC39 | chr19_19202339_AGTT/A       | Inframe deletion  | <i>RFXANK</i>    | L23.1  | LHKIVDFYPEDNSLQTFPIAAEVD   |
|       |                             |                   |                  | L23.2  | LHKIVDFYPEDNSLQISPCFVGGW   |
| NIC39 | chr19_3193350_G/C           | Missense          | <i>NCLN</i>      | L24    | AMETAVPVYFAVQDEALLSIYKQTQ  |
| NIC39 | chr19_41116275_G/T          | Missense          | <i>CYP2F1</i>    | L25    | CLLLTSSRDKGNLPPGPRPLSILG   |
| NIC39 | chr19_6534932_C/T           | Missense          | <i>TNFSF9</i>    | L26    | QGRLLHLSAGQCLGVHLHTEARAR   |
| NIC39 | chr19_9980686_C/G           | Missense          | <i>COL5A3</i>    | L27    | PGATGQPGPKGDLGQDGAPGIPGEK  |
| NIC39 | chr20_5922477_C/A           | Missense          | <i>CHGB</i>      | L28    | SSRGEAGAPGEEIIGQPTKADTEKW  |
| NIC39 | chr2_131052950_G/A          | Missense          | <i>FAM168B</i>   | L29    | PVAPHPVTPTYWAPGTPPTYSVPPP  |
| NIC39 | chr21_46389270_G/C          | Missense          | <i>PCNT</i>      | L30    | LPDLRTLSECAQMSVAEISSHMR    |
| NIC39 | chr2_24024246_G/A           | Missense          | <i>MFS2B</i>     | L31.1  | MVGSTPKTPSRDTSRSLRRLRSTY   |
|       |                             |                   |                  | L31.2  | LCILMVGSTPKTPSRDTSRSLRRLR  |
|       |                             |                   |                  | L31.3  | MVGSTPKTPSRDTSRSLRRLRVLHH  |
| NIC39 | chr22_41177044_G/C          | Missense          | <i>EP300</i>     | L32    | QHTKGCRRKTNAGCICKQLIALCC   |
| NIC39 | chr3_129250763_C/T          | Missense          | <i>COPG1</i>     | L33    | SAVLQEASDICSPLAFIINIHHQCN  |

|       |                      |            |                 |       |                           |
|-------|----------------------|------------|-----------------|-------|---------------------------|
| NIC39 | chr3_133838231_G/A   | Missense   | <i>RAB6B</i>    | L34   | DKRQITIEEGEQCAKELSVMIETS  |
| NIC39 | chr3_64615973_G/A    | Missense   | <i>ADAMTS9</i>  | L35   | CSGECNTGGWRYFAWTECKSCDGG  |
| NIC39 | chr4_883459_C/T      | Missense   | <i>GAK</i>      | L36   | LDISYITSRIAVISFPAEGVESALK |
| NIC39 | chr4_989975_C/T      | Missense   | <i>IDUA</i>     | L37   | QLHKRFGSSVAGNIPTGFMPQVPE  |
| NIC39 | chr5_112839783_GA/G  | Frameshift | <i>APC</i>      | L38.1 | SRCTSVSSLDSFGVVRLPAPFRVNH |
|       |                      |            |                 | L38.2 | SVSSLDSFGVVRLPAPFRVNHAVEW |
| NIC39 | chr5_1338974_G/GCACT | Frameshift | <i>CLPTM1L</i>  | L39   | INLLTGESDTQQIEAEKPTSECPG  |
| NIC39 | chr5_141955118_G/A   | Missense   | <i>RNF14</i>    | L40   | PQRPPASSATLRWQRHLNGKVSPEK |
| NIC39 | chr6_106511835_G/A   | Missense   | <i>CRYBG1</i>   | L41   | HENDSPQLEPLETEGEPFDATTTA  |
| NIC39 | chr6_119348513_G/A   | Missense   | <i>MAN1A1</i>   | L42   | PVDFVPIGVESWEPADAAIREKRA  |
| NIC39 | chr6_1312718_T/C     | Missense   | <i>FOXQ1</i>    | L43   | MKLEAFVPRAAHGDKQGSDELGAGG |
| NIC39 | chr6_149378140_G/C   | Missense   | <i>TAB2</i>     | L44   | SDDSGISGLRNHITLNLDLQSQNI  |
| NIC39 | chr6_38703045_G/A    | Missense   | <i>GLO1</i>     | L45   | MAESQPPSGGLTDEAALSCCSDADP |
| NIC39 | chr6_4130838_TG/T    | Frameshift | <i>C6orf201</i> | L46   | KLKLYALYKQATEGPCNMPNQVYLT |
| NIC39 | chr7_134661775_C/T   | Missense   | <i>BPGM</i>     | L47   | WVPVSSWRNLNECHYALIGLNREQ  |
| NIC39 | chr7_144363086_T/G   | Missense   | <i>ARHGEF5</i>  | L48   | CPIQSEHLDMAPLSSDLGSEEEVE  |
| NIC39 | chr7_43624714_G/C    | Missense   | <i>COA1</i>     | L49   | TKESIVTEELIVLTSYTLGQCQSE  |
| NIC39 | chr8_39922577_C/T    | Missense   | <i>IDO1</i>     | L50   | LTYENMDVLFSCDGDCKGFFLVS   |
| NIC39 | chr8_52657517_G/A    | Missense   | <i>RB1CC1</i>   | L51   | MMVESLYSSVINVIDSRMQDTNVC  |
| NIC39 | chr9_106927814_G/T   | Missense   | <i>ZNF462</i>   | L52   | PALKATVTSIMRLAFLDLGIEAGYH |
| NIC39 | chr9_127482955_G/C   | Missense   | <i>LRSAM1</i>   | L53   | SEILKSLNERITMEQLMSITQEET  |
| NIC39 | chr9_136854652_G/T   | Missense   | <i>PHPT1</i>    | L54   | AGGPERPSWPRRYHSRNSAQGSFLV |
| NIC39 | chrM_5227_G/A        | Missense   | <i>MT-CO2</i>   | L55   | TPLIPSTLLSLGDLPLTGFPLKWA  |
| NIC39 | chrX_53580849_G/C    | Missense   | <i>HUWE1</i>    | L56   | VANCCIRIALPAARGSGTASDDEFE |
| NIC39 | chrX_70287275_C/A    | Splice     | <i>KIF4A</i>    | L57.1 | NDVDFQDIEHSKIIIKRGRLCTRK  |
|       |                      |            |                 | L57.2 | IIIKRGRLCTRKLQPTALHVDVSM  |
|       |                      |            |                 | L57.3 | IAKKRGLCTRKLQPTALHVDVSMTC |

SLP - synthetic long peptide



**Table S3** | 40-marker imaging mass cytometry panel

| Target          | Clone           | Metal  | Incubation Time | Temp | Dilution |
|-----------------|-----------------|--------|-----------------|------|----------|
| B catenin       | D10A8           | 89Y    | Overnight       | 4C   | 100      |
| TGFbeta         | TB21            | 115In  | 5h              | RT   | 100      |
| HLA-DR          | TAL 1B5         | 141 Pr | 5h              | RT   | 100      |
| CD20            | H1              | 142 Nd | Overnight       | 4C   | 100      |
| CD68            | D4B9C           | 143 Nd | Overnight       | 4C   | 100      |
| CD11b           | D6X1N           | 144 Nd | 5h              | RT   | 100      |
| CD4 +2nd Ab     | EPR6855         | 145 Nd | Indirect ON     | RT   | 100      |
| CD8a            | D8A8Y           | 146 Nd | 5h              | RT   | 50       |
| CD31            | 89C2            | 147 Sm | Overnight       | 4C   | 100      |
| TCRgd + 2nd Ab  | H41             | 148 Nd | Indirect ON     | 4C   | 50       |
| CD45            | D9M8I           | 149 Sm | Overnight       | 4C   | 50       |
| Granzyme B      | D6E9W           | 150 Nd | 5h              | RT   | 100      |
| CD57            | HNK-1 / Leu-7   | 151 Eu | Overnight       | 4C   | 100      |
| Ki-67           | 8D5             | 152 Sm | Overnight       | 4C   | 100      |
| CD3             | EP449E          | 153 Eu | Overnight       | 4C   | 50       |
| TIM3            | D5D5R           | 154 Sm | 5h              | RT   | 100      |
| LAG-3           | D2G40           | 155 Gd | 5h              | RT   | 50       |
| PD-L1           | E1L3N           | 156 Gd | Overnight       | 4C   | 50       |
| CD39            | EPR20627        | 157 Gd | 5h              | RT   | 100      |
| VISTA           | D1L2G           | 158 Gd | 5h              | RT   | 100      |
| FOXP3           | D608R           | 159 Tb | Overnight       | 4C   | 50       |
| PD-1            | D4W2J           | 160 Gd | 5h              | RT   | 50       |
| ICOS            | D1K2T           | 161 Dy | 5h              | RT   | 50       |
| IDO             | D5J4E           | 162 Dy | Overnight       | 4C   | 100      |
| CD14            | D7A2T           | 163 Dy | 5h              | RT   | 100      |
| CD204           | J5HTR3          | 164 Dy | 5h              | RT   | 50       |
| CD45RO          | UCHL1           | 165 Ho | Overnight       | 4C   | 100      |
| PDPN            | D2-40           | 166 Er | Overnight       | 4C   | 100      |
| CD56            | E7X9M           | 167 Er | 5h              | RT   | 100      |
| CD103           | EPR4166(2)      | 168 Er | 5h              | RT   | 50       |
| CD38            | EPR4106         | 169 Tm | Overnight       | 4C   | 100      |
| Tbet            | 4B10            | 170 Er | 5h              | RT   | 50       |
| CD15            | MC480           | 171 Yb | Overnight       | 4C   | 100      |
| Cleaved-caspase | 5A1E            | 172 Yb | 5h              | RT   | 100      |
| CD163           | D6U1J           | 173 Yb | 5h              | RT   | 50       |
| CD7             | EPR4242         | 174 Yb | 5h              | RT   | 100      |
| p16ink4a        | D3W8G           | 175 Lu | Overnight       | 4C   | 100      |
| CD11c           | EP1347Y         | 176 Yb | 5h              | RT   | 100      |
| Vimentin        | D21H3           | 194 Pt | Overnight       | 4C   | 50       |
| Keratin         | C11 and AE1/AE3 | 198 Pt | Overnight       | 4C   | 50       |

**Table S4** | Number of T cells at sorting and after expansion.

| Patient | #Cells |      |      |      | %    |      |      |      | Primary expansion rate |        |        |      | Restimulation expansion rate |        |      |        |
|---------|--------|------|------|------|------|------|------|------|------------------------|--------|--------|------|------------------------------|--------|------|--------|
|         | DP     | SP   | DN   | SP39 | DP   | SP   | DN   | SP39 | DP                     | SP     | DN     | SP39 | DP                           | SP     | DN   | SP39   |
| NIC4    | 610    | 1447 | 1792 | 353  | 11,7 | 37,6 | 47,3 | 3,42 | 157377                 | 32480  | 42410  |      |                              |        |      |        |
| NIC5    | 595    | 51   | 185  | 94   | 61   | 7,32 | 24,1 | 7,89 |                        | 882352 | 145945 |      |                              |        |      | 797872 |
| NIC7    | 1110   | 738  | 3549 | 246  | 25,0 | 13,9 | 52,1 | 9,0  | 2703                   |        | 10989  |      |                              | 207317 |      |        |
| NIC16   | 8342   | 301  | 445  | 84   | 91,0 | 3,3  | 4,4  | 1,4  | 4075                   |        |        |      |                              | 5980   | 4270 |        |
| NIC17   | 2095   | 727  | 2677 | 24   | 38,6 | 15,9 | 44,8 | 0,7  |                        |        | 16809  |      | 4296                         | 7703   |      |        |
| NIC20   | 287    | 418  | 650  | 29   | 29,6 | 28,6 | 37,5 | 4,3  | 142857                 | 74163  | 63077  |      |                              |        |      |        |
| NIC22   | 31000  | 649  | 484  | 51   | 96,5 | 2,0  | 1,3  | 0,2  | 7419                   | 37750  | 32231  |      |                              |        |      |        |
| NIC25   | 224    | 895  | 478  | 18   | 23,2 | 50,6 | 23,5 | 2,7  |                        | 2123   | 17364  |      | 232143                       |        |      |        |
| NIC27   | 6574   | 1602 | 2070 | 95   | 66,5 | 14,2 | 16,5 | 2,8  | 11409                  | 8115   | 26962  |      |                              |        |      |        |
| NIC38   | 29768  | 157  | 409  | NA   | 97,4 | 0,7  | 1,6  | 0,3  | 2284                   | 40764  | 18582  |      |                              |        |      |        |
| NIC39   | 1400   | 5337 | 1821 | 136  | 26,6 | 52,7 | 18,7 | 2,1  |                        | 2248   | 4723   |      |                              |        |      |        |

SP - CD103+CD39-
